# Supplementary material
Source: PubMed Central journal article supplement (PMC6583037)
Supplement: jama-319-1773-s001.pdf [file jama-319-1773-s001.pdf]

**Essai randomisé contrôlé multicentrique de non infériorité****Protocole INDAO****Glyburide versus insulin for the prevention of perinatal complications of gestational diabetes: a pragmatic, non-inferiority, randomized trial****INDAO Protocol**

## Investigator-coordinator:

Prof Marie-Victoire SENAT  
Service Gynécologie et obstétrique  
78, rue du Général Leclerc 94275 Le Kremlin-Bicêtre Cedex  
Tel: 01 45 21 75 55 Fax: 01 45 21 77 25  
Email: marie-victoire.senat@aphp.fr

## Scientific director:

Jean Bouyer  
Unité INSERM 1018  
Centre de recherche en Epidémiologie et de Santé des Population.  
Equipe "Epidémiologie de la reproduction et du développement de l'enfant".  
78, rue du Général Leclerc 94275 Le Kremlin-Bicêtre Cedex  
Tel: 01 45 21 20 35  
Email: jean.bouyer@inserm.fr

## Study sponsor:

Assistance Publique des Hôpitaux de Paris  
Département de la Recherche Clinique et du Développement (DRCD)  
Carré Historique, Hôpital Saint-Louis  
1 avenue Claude Vellefaux, 75010 Paris  
Chef de projet: Shohreh AZIMI  
Tél.: 01 44 84 17 79 Fax: 01 44 84 17 01  
Email: shohreh.azimi@aphp.fr

## Paris Sud clinical research unit:

Prof Laurent Becquemont  
Hôpital Kremlin Bicêtre  
78, rue du Général Leclerc 94275 Le Kremlin-Bicêtre Cedex  
Tél 01.45.21.31.72 Fax 01.45.21.36.51  
Email: laurent.becquemont@bct.aphp.fr

## Agence Générale des équipements et produits de Santé (AGEPS), AP-HP:

Mohammed BENAMMAR  
Unités des Essais cliniques  
7, rue du Fer à Moulin. 75 005 Paris  
Tel: 01 46 69 90 72 / Fax: 01 46 69 14 09  
Email :mohammed.benammar@eps.aphp.fr

## Scientific committee

Jean Bouyer  
Unité INSERM 1018. Centre de recherche en Epidémiologie et Santé des Populations. Equipe  
"Epidémiologie de la reproduction et du développement de l'enfant".  
Tél 01 45 21 20 35 Email: jean.bouyer@inserm.fr

Prof Philippe Chanson/ Dr Helene Affres  
Service d'endocrinologie, Hôpital Kremlin Bicêtre  
78, rue du Général Leclerc

- 49 94275 Le Kremlin-Bicêtre Cedex  
50 Tél 01 45 21 37 05 Fax: 01 45 21 22 12 Email: philippe.chanson@aphp.fr
- 51 Prof Delphine Mitanchez  
52 Service de Néonatalogie, Hôpital Armand Trousseau  
53 26, avenue du Docteur Arnold-Netter - 75571 PARIS Cedex 12  
54 Tel: 01 44 73 61 91 Fax: 01 44 73 68 92 Email: delphine.mitanchez@aphp.fr
- 55 Steering committee
- 56 Prof Marie-Victoire SENAT  
57 Service Gynécologie et obstétrique  
58 78, rue du Général Leclerc  
59 94275 Le Kremlin-Bicêtre Cedex  
60 Tel: 01 45 21 75 55 Fax: 01 45 21 77 25 Email: marie-victoire.senat@aphp.fr
- 61 Jean Bouyer  
62 Unité INSERM 1018. Centre de recherche en Epidémiologie et Santé des Populations. Equipe  
63 "Epidémiologie de la reproduction et du développement de l'enfant".  
64 Tél 01 45 21 20 35 Email: jean.bouyer@inserm.fr
- 65 Independent monitoring committee
- 66 Prof François Goffinet  
67 Maternité de Port-Royal  
68 Groupe Hospitalier Broca-Cochin-Saint Vincent De Paul-Hôtel Dieu  
69 123 boulevard du Port-Royal  
70 75014 PARIS  
71 Tel: 01 58 41 20 69 Fax: 01 58 41 21 05 Email: francois.goffinet@aphp.fr
- 72 Dr Vincent GAJDOS  
73 Service de Pédiatrie  
74 Hôpital Antoine Béchère  
75 157, rue de la Porte de Trivaux,  
76 92140 Clamart  
77 Tel: 01 45 37 42 72 Fax: 01 45 21 42 99 Email: [vincent.gajdos@aphp.fr](mailto:vincent.gajdos@aphp.fr)
- 78 Dr Eric Pussard  
79 Service de Pharmacologie  
80 78, rue du Général Leclerc  
81 94275 Le Kremlin-Bicêtre Cedex  
82 Tel: 01 45 21 35 80 Fax: 01 45 21 35 91 Email: eric.pussard@aphp.fr
- 83  
84

85

86

## TABLE OF CONTENTS

87

88

|          |                     |          |
|----------|---------------------|----------|
| <b>1</b> | <b>Introduction</b> | <b>5</b> |
|----------|---------------------|----------|

89

|          |                                                                     |          |
|----------|---------------------------------------------------------------------|----------|
| <b>2</b> | <b>Scientific rationale and general description of the research</b> | <b>5</b> |
|----------|---------------------------------------------------------------------|----------|

90

|  |                                                                 |   |
|--|-----------------------------------------------------------------|---|
|  | 2.1 Definition of gestational diabetes and screening modalities | 5 |
|--|-----------------------------------------------------------------|---|

91

|  |                                                                 |   |
|--|-----------------------------------------------------------------|---|
|  | 2.2 Neonatal complications associated with gestational diabetes | 5 |
|--|-----------------------------------------------------------------|---|

92

|  |                                                           |   |
|--|-----------------------------------------------------------|---|
|  | 2.3 Proven value of the treatment of gestational diabetes | 6 |
|--|-----------------------------------------------------------|---|

93

|  |                     |   |
|--|---------------------|---|
|  | 2.4 Insulin therapy | 6 |
|--|---------------------|---|

94

|  |                                      |   |
|--|--------------------------------------|---|
|  | 2.5 Oral antidiabetics and glyburide | 6 |
|--|--------------------------------------|---|

95

|  |                                     |   |
|--|-------------------------------------|---|
|  | 2.6 Results of studies of glyburide | 7 |
|--|-------------------------------------|---|

96

|  |                                         |   |
|--|-----------------------------------------|---|
|  | 2.7 Description of the study population | 9 |
|--|-----------------------------------------|---|

97

|  |                                         |    |
|--|-----------------------------------------|----|
|  | 2.8 What INDAO adds to published trials | 10 |
|--|-----------------------------------------|----|

98

|  |                                  |    |
|--|----------------------------------|----|
|  | 2.9 Trial length and feasibility | 10 |
|--|----------------------------------|----|

99

|  |                 |    |
|--|-----------------|----|
|  | 2.10 Assumption | 10 |
|--|-----------------|----|

100

|  |                        |    |
|--|------------------------|----|
|  | 2.11 Primary objective | 10 |
|--|------------------------|----|

101

|  |                           |    |
|--|---------------------------|----|
|  | 2.12 Secondary objectives | 10 |
|--|---------------------------|----|

102

|  |                      |    |
|--|----------------------|----|
|  | 2.13 Primary outcome | 10 |
|--|----------------------|----|

103

|  |                         |    |
|--|-------------------------|----|
|  | 2.14 Secondary outcomes | 10 |
|--|-------------------------|----|

104

|  |                  |    |
|--|------------------|----|
|  | 2.15 Methodology | 11 |
|--|------------------|----|

105

|  |                                                   |    |
|--|---------------------------------------------------|----|
|  | 2.16 Experimental plan – practical considerations | 11 |
|--|---------------------------------------------------|----|

106

|  |                                   |    |
|--|-----------------------------------|----|
|  | 2.17 Steps taken to minimize bias | 14 |
|--|-----------------------------------|----|

107

|  |                                                                 |    |
|--|-----------------------------------------------------------------|----|
|  | 2.18 Dosage and mode of administration of the experimental drug | 15 |
|--|-----------------------------------------------------------------|----|

108

|  |                                           |    |
|--|-------------------------------------------|----|
|  | 2.19 Description of the experimental drug | 15 |
|--|-------------------------------------------|----|

109

|  |                                        |    |
|--|----------------------------------------|----|
|  | 2.20 Description of the reference drug | 15 |
|--|----------------------------------------|----|

110

|  |                                                  |    |
|--|--------------------------------------------------|----|
|  | 2.21 Experimental drug accountability procedures | 15 |
|--|--------------------------------------------------|----|

111

|  |                               |    |
|--|-------------------------------|----|
|  | 2.22 Duration of the research | 15 |
|--|-------------------------------|----|

112

|  |                                                   |    |
|--|---------------------------------------------------|----|
|  | 2.23 Rules for temporary or definitive withdrawal | 15 |
|--|---------------------------------------------------|----|

113

|          |                                           |           |
|----------|-------------------------------------------|-----------|
| <b>3</b> | <b>Selection of research participants</b> | <b>16</b> |
|----------|-------------------------------------------|-----------|

114

|  |                        |    |
|--|------------------------|----|
|  | 3.1 Inclusion criteria | 16 |
|--|------------------------|----|

115

|  |                            |    |
|--|----------------------------|----|
|  | 3.2 Non-inclusion criteria | 16 |
|--|----------------------------|----|

116

|  |                        |    |
|--|------------------------|----|
|  | 3.3 Exclusion criteria | 17 |
|--|------------------------|----|

117

|  |                                                                    |    |
|--|--------------------------------------------------------------------|----|
|  | 3.4 Simultaneous participation in other research, exclusion period | 17 |
|--|--------------------------------------------------------------------|----|

118

|          |                                |           |
|----------|--------------------------------|-----------|
| <b>4</b> | <b>Treatments administered</b> | <b>17</b> |
|----------|--------------------------------|-----------|

119

|  |                                           |    |
|--|-------------------------------------------|----|
|  | 4.1 Treatments necessary for the research | 17 |
|--|-------------------------------------------|----|

120

|  |                                                   |    |
|--|---------------------------------------------------|----|
|  | 4.2 Methods for monitoring adherence to treatment | 17 |
|--|---------------------------------------------------|----|

121

|  |                                        |    |
|--|----------------------------------------|----|
|  | 4.3 Provision of the experimental drug | 18 |
|--|----------------------------------------|----|

122

|  |                                         |    |
|--|-----------------------------------------|----|
|  | 4.4 Treatment discontinuation procedure | 18 |
|--|-----------------------------------------|----|

123

|  |                                                                                  |    |
|--|----------------------------------------------------------------------------------|----|
|  | 4.5 Integration of INDAO in the management of patients with gestational diabetes | 18 |
|--|----------------------------------------------------------------------------------|----|

124

|          |                               |           |
|----------|-------------------------------|-----------|
| <b>5</b> | <b>Evaluation of efficacy</b> | <b>19</b> |
|----------|-------------------------------|-----------|

125

|  |                                           |    |
|--|-------------------------------------------|----|
|  | 5.1 Parameters for evaluation of efficacy | 19 |
|--|-------------------------------------------|----|

126

|  |                                                                                          |  |
|--|------------------------------------------------------------------------------------------|--|
|  | 5.2 Methods and timetable for the measurement, recording, and analysis of parameters for |  |
|--|------------------------------------------------------------------------------------------|--|

127

|  |                        |    |
|--|------------------------|----|
|  | evaluation of efficacy | 20 |
|--|------------------------|----|

128

|          |                             |           |
|----------|-----------------------------|-----------|
| <b>6</b> | <b>Assessment of safety</b> | <b>20</b> |
|----------|-----------------------------|-----------|

|     |           |                                                                                            |           |
|-----|-----------|--------------------------------------------------------------------------------------------|-----------|
| 129 | 6.1       | Description of parameters of safety assessment                                             | 20        |
| 130 | 6.2       | Adverse reactions to treatment                                                             | 20        |
| 131 | 6.3       | Methods and timetable for measuring, recording, and analyzing safety assessment parameters |           |
| 132 |           | – Study committees                                                                         | 21        |
| 133 | 6.4       | Adverse event reporting                                                                    | 21        |
| 134 | 6.5       | Modalities and duration of follow-up of patients after adverse events                      | 22        |
| 135 | <b>7</b>  | <b>Statistics</b>                                                                          | <b>22</b> |
| 136 | 7.1       | Data analysis                                                                              | 22        |
| 137 | 7.2       | Planned number of people to be included in the research                                    | 22        |
| 138 | 7.3       | Missing data                                                                               | 23        |
| 139 | 7.4       | Choice of patients to be included in the analysis                                          | 23        |
| 140 | 7.5       | Transcription of data in the case report form                                              | 23        |
| 141 | <b>8</b>  | <b>Ethical Considerations</b>                                                              | <b>23</b> |
| 142 | 8.1       | Application to AFSSAPS for authorization                                                   | 23        |
| 143 | 8.2       | Submission of the protocol to the ethics committee                                         | 24        |
| 144 | <b>9</b>  | <b>Declaration to the French data protection authority</b>                                 | <b>24</b> |
| 145 | 9.1       | Information note and informed consent                                                      | 24        |
| 146 | <b>10</b> | <b>REFERENCES</b>                                                                          | <b>24</b> |
| 147 | <b>11</b> | <b>List of study centers</b>                                                               | <b>27</b> |
| 148 | <b>12</b> | <b>Algorithm for adaptation of Daonil® doses given to the patient at appointments</b>      | <b>28</b> |
| 149 | <b>13</b> | <b>Satisfaction questionnaire</b>                                                          | <b>29</b> |
| 150 | <b>14</b> | <b>Reporting noninferiority and equivalence (CONSORT)</b>                                  | <b>31</b> |
| 151 | <b>15</b> | <b>Classification of serious adverse events</b>                                            | <b>32</b> |
| 152 |           |                                                                                            |           |
| 153 |           |                                                                                            |           |

## 1 INTRODUCTION

In patients presenting gestational diabetes, therapeutic management comprising diet management, blood sugar monitoring, and, if necessary, insulin therapy is associated with decreased neonatal complications. Although of proven efficacy, insulin treatment has various drawbacks, notably in terms of implementation and adherence. An alternative is the use of oral antidiabetics, particularly sulfonylureas like glyburide. Although the data comparing glyburide and insulin in treatment of gestational diabetes show similar control of maternal blood glucose and a comparable rate of neonatal complications, most countries do not recommend glyburide in the treatment of gestational diabetes. This is mainly because of methodological weaknesses in existing studies: insufficient power to demonstrate a lack of between-treatment difference in the rate of neonatal complications in the only valid randomized trial, moderate quality with heterogeneous criteria, and biases inherent to observational studies.

## 2 SCIENTIFIC RATIONALE AND GENERAL DESCRIPTION OF THE RESEARCH

### 2.1 Definition of gestational diabetes and screening modalities

The World Health Organization (WHO) defines gestational diabetes as impaired glucose tolerance leading to hyperglycemia of variable severity that occurs or is first diagnosed during pregnancy, regardless of the treatment needed and post-partum progression. The estimated prevalence of gestational diabetes is between 2.2% and 8.8% of pregnancies [1], depending on the populations studied and the screening criteria used. In France, the Audipog network reports an estimated prevalence of 4% to 5% [2]. Gestational diabetes has been increasing in prevalence for some years, probably because of changes in the eating habits of patients, increased maternal mean age at pregnancy, and increased body mass index (BMI). The main risk factors are overweight, age, ethnic origin, first-degree family history of type 2 diabetes, history of gestational diabetes or of macrosomia, and polycystic ovary syndrome. Uncontrolled hyperglycemia is a source of well-known maternal and fetal complications, both short- and long-term [3].

There are currently 2 methods of diagnosing gestational diabetes between 24 and 28 weeks of gestation: the two-step **O'Sullivan test** (detection by blood glucose measurement one hour after ingestion of 50 g of glucose) [4] then diagnosis of hyperglycemia by means of a 100-g oral glucose tolerance test (OGTT) over 3 hours) [5]; and the one-step **WHO test** (75-g OGTT over 2 hours) [6]. A single study [3] has investigated the relations between maternal-fetal morbidity and blood glucose, after screening by 75-g OGTT. This method has the advantage of greater safety, reduced time till treatment, and better adherence because of one-step screening and diagnosis. This is why the International Association of Diabetes Pregnancy Study Group (IADPS) has proposed, as diagnostic criteria of gestational diabetes between 24 and 28 weeks of gestation, a fasting blood glucose  $\geq 0.92$  g/L (5.1 mmol/L) and/or blood glucose  $\geq 1.80$  g/L (10.0 mmol/L) 1 hour after a 75-g oral glucose challenge and/or blood glucose  $\geq 1.53$  g/L (8.5 mmol/L) 2 hours after glucose challenge, these values being associated with a 1.75-fold increase in the risk of macrosomia and fetal hyperinsulinism [7]. These criteria have just been included in the 2010 recommendations (in press) for screening for gestational diabetes in French clinical practice.

Once gestational diabetes is diagnosed, treatment usually comprises dietary management plus either self-monitoring of fasting blood glucose and postprandial blood glucose 10 days later or self-monitoring of blood glucose 4 times/day. However, approximately 20% to 30% of patients need treatment on top of dietary management alone. In France, the only drug treatment used is subcutaneous insulin. So, approximately 1% to 2% of all pregnant women have gestational diabetes requiring insulin treatment, ie, 8 000 to 16 000 per year in France.

### 2.2 Neonatal complications associated with gestational diabetes

In 2008, the Hyperglycemia and Adverse Pregnancy Outcome (HAPO) study [3] revealed a continuum between maternal blood glucose during pregnancy and perinatal risks. Fasting blood glucose and blood glucose 1 hour and 2 hours after a 75-g oral glucose challenge were positively and linearly associated with the risk of macrosomia, neonatal hypoglycemia, shoulder dystocia, and neonatal hyperbilirubinemia. It was also shown that these risks were increased even for blood glucose considered normal in pregnant women (fasting blood glucose  $<0.95$  g/L).

### 2.3 Proven value of the treatment of gestational diabetes

In patients with gestational diabetes, therapeutic management, dietary management, blood sugar monitoring, and, if necessary, insulin therapy are associated with a decrease in neonatal complications [8-14]. Two randomized trials comparing active treatment of gestational diabetes with usual pregnancy follow-up showed a decrease in maternal-fetal morbidity in the interventional group [8, 12].

The first trial [8] included 1000 women at between 24 and 34 weeks of gestation with blood glucose >1.40 g/L (7.8 mmol/L) after 50 g of glucose, with fasting blood glucose <1.40 g/L (7.8 mmol/L) after 75-g OGTT, and blood glucose between 1.40 g/L and 2 g/L (7.8 mmol/L and 11 mmol/L) at 2 h. The patients of the control group and the medical team were unaware of blood glucose levels. The intervention group had dietary management adapted to weight before pregnancy, to weight gain during pregnancy, and to usual diet plus self-monitoring of capillary blood glucose 4 times/day. The blood glucose targets were fasting blood glucose between 0.63 g/L (3.5 mmol/L) and 0.99 g/L (5.5 mmol/L), preprandial blood glucose <0.99 g/L (5.5 mmol/L), and postprandial blood glucose <1.26 g/L (7 mmol/L) at 2 h. The insulin treatment was started if 2 fasting or postprandial blood glucose values exceeded the targets or if 1 postprandial blood glucose value was >1.62 g/L (9 mmol/L) over a 15-day monitoring period. Twenty per cent of patients in the intervention group were given insulin. The composite endpoint, combining perinatal death, shoulder dystocia, fracture of an upper limb, and paralysis of the plexus brachial, was significantly decreased in the intervention group compared with the "usual treatment" group (4% vs 1%,  $p<0.05$ ); the rates of macrosomia and birth weight >90<sup>th</sup> percentile for gestational age were also significantly decreased in the intervention group (10% vs 21% and 13% vs 22%,  $p<0.001$ ).

The second trial [12], the aim of which was to evaluate the efficacy of active treatment of moderate gestational diabetes, included 958 women at between 24 and 30 weeks of gestation with blood glucose of between 1.35 and 2.00 g/L (7.5 mmol/L and 11 mmol/L) 1 h after 50 g of glucose and a 100-g OGTT with fasting blood glucose <0.95 g/L (5.3 mmol/L), and at least 2 abnormal blood glucose values at 1 h, 2 h or 3 h (>1.80 g/L [10 mmol/L] at 1 h; 1.55 g/L [8.6 mmol/L] at 2 h; 1.40 g/L [7.7 mmol/L] at 3 h). The women were randomized to the intervention group or to the control (usual treatment) group. The treatment of the intervention group comprised dietary management, monitoring of fasting blood glucose and of postprandial glucose at 2 h, and insulin therapy if the targets were not reached. The blood glucose targets were a fasting blood glucose <0.95 g/L (5.3 mmol/L) and postprandial glucose at 2 h <1.20 g/L (6.7 mmol/L). There was no between-group difference in the composite endpoint combining neonatal death, hyperbilirubinemia, hypoglycemia, hyperinsulinism, and neonatal trauma (32.4% and 37% in the intervention and control groups, respectively;  $p=0.14$ ). In the intervention group, there were significant decreases in the frequency of macrosomia (5.9% versus 14.3%), children of birth weight >90<sup>th</sup> percentile (7.1% versus 14.5%), and shoulder dystocia (1.5% versus 4.0%).

Active treatment comprising dietary management, blood glucose self-monitoring, and insulin treatment, if necessary, is therefore beneficial in the treatment of gestational diabetes.

### 2.4 Insulin therapy

Insulin therapy is currently the reference therapeutic strategy used to manage gestational diabetes when blood glucose targets are not achieved by dietary management alone. One of insulin's advantages is that, because of its high molecular weight (6000 Da), it does not cross the placental barrier and so in theory there are no fetal or neonatal side effects.

Although of proven efficacy [8, 12], insulin treatment has several drawbacks. It is inconvenient as it generally requires 4 and sometimes 5 subcutaneous injections a day. It also requires appropriate training on how to perform injections and on capillary blood glucose monitoring 4 to 6 times a day. There is often a need for endocrinologists to adjust the treatment with, if necessary, short hospitalization. And, lastly, insulin treatment is expensive, because of the restrictions related to its use, and involves a risk of maternal hypoglycemia.

### 2.5 Oral antidiabetics and glyburide

Alternatives to oral antidiabetics have been envisaged for some years. Although they cross the placenta, biguanides (Metformin®) have no long-term effects on the fetus, but they are effective on blood sugar balance in only 54% of cases, meaning that they are of little value as an alternative to insulin therapy [15]. Sulfonylureas, like glyburide, are the other drug class of choice.

#### Pharmacology of glyburide

Drug class: sulfonylurea, oral antidiabetic (ATC code: A10BB01; A: alimentary tract and metabolism).

Glyburide is a second-generation sulfonylurea with a short half-life which is completely metabolized by the liver into 3 inactive metabolites that are eliminated in bile (60%) and by the kidneys (40%). Its half-life of elimination is on average 4 hours [16]. Glyburide induces a sharp drop in blood glucose by stimulating insulin

259 release by the pancreas, an effect that is dependent on the presence of active  $\beta$  cells in the pancreatic islets.  
260 Sulfonylureas act on the potassium and calcium channels, which leads to depolarization of cells and release of  
261 insulin by the  $\beta$  cells of the pancreas. Insulin secretion abolishes liver production of glucose, which is a major  
262 factor of high fasting blood glucose [17, 18].

263 Administration of glyburide to a diabetic patient enhances the postprandial insulinotropic response and so  
264 lowers postprandial blood glucose. After oral administration, glyburide is strongly absorbed (98%). Peak plasma  
265 concentration is reached in 2 to 6 hours. Food intake alters neither the rate nor the percentage of absorption.

266 Hepatic insufficiency decreases glyburide metabolism and so greatly slows its elimination. Biliary  
267 excretion of metabolites increases in cases of renal insufficiency in proportion to the severity of renal  
268 impairment. Renal insufficiency does not affect the elimination of glyburide as long as creatinine clearance  
269 remains above 30 mL/min.

270 An in vitro model of placental perfusion has shown that, in contrast to other sulfonylureas, the passage of  
271 glyburide across the placenta, from the maternal circulation to the fetal circulation, is insignificant, even if the  
272 maternal glyburide concentration is increased 100-fold compared with the therapeutic level used [19, 20]. This is  
273 in part explained by glyburide's very high plasma protein binding (99.8%), short plasma half-life, and rapid  
274 elimination [20]. Langer et al [21] confirmed these data in a randomized trial. Chromatographic analysis showed  
275 there was no glyburide in the cord blood of newborns. Also, in 12 randomly selected cases of mother and child,  
276 glyburide was undetectable in the cord blood of the newborn, whereas its concentration was between 50 and  
277 150 ng/mL in the mother. A recent pharmacological review of the potential value of glyburide in the treatment of  
278 gestational diabetes supports these pharmacological data [22]. However, an in vivo pharmacological study  
279 shows that, in term pregnancies, there is maternal-fetal transfer of glyburide across the placenta, but also  
280 shows, after studies of glyburide concentrations, that glyburide can be used safely up to a dose of 20 mg/day  
281 [23].

#### 282 - Teratogenicity

283 To date, no teratogenicity has been reported in animal studies. Here are the data on glyburide updated in June  
284 2011 by the Centre de Référence des Agents Tératogènes (CRAT):

#### 285 - Malformations

286 Published data on pregnant women exposed to glyburide during the first trimester are scarce, but no  
287 malformation has been recorded to date. Glyburide is not teratogenic in animal studies.

#### 288 - Fetal and neonatal effects

289 Published data on the second and third trimesters are numerous and no particular neonatal effect has been  
290 noted in newborns. These data essentially concern gestational diabetes.

#### 291 - Treatment of pregnant women

292 If the specialists managing the patient deem it relevant, the use of glyburide can therefore be envisaged,  
293 particularly during the second and third trimesters. When treatment continues to term, neonatal blood glucose  
294 will be monitored on principle.

#### 295 - Discovery of pregnancy during treatment

296 Reassure the patient regarding the risk of malformation associated with glyburide (meaning that glyburide does  
297 not increase the baseline 2% to 3% risk of malformation in any pregnancy. The discovery of pregnancy in a  
298 diabetic woman calls for appropriate multidisciplinary management.

## 299 2.6 Results of studies of glyburide

### 300 **Observational studies**

301 Nonrandomized retrospective or prospective studies comparing the effects of insulin and glyburide in the  
302 treatment of the gestational diabetes (Table 1) show that glyburide is effective in achieving glycemic control,  
303 with a nonsignificant between-group difference in fasting and postprandial blood glucose. Only the study by  
304 Jacobson et al shows that fasting and postprandial blood glucose targets were reached more often in the  
305 glyburide group than in the insulin group (86% versus 63%  $p < 0.001$ ), including after adjustment for body mass  
306 index, ethnicity, fasting blood glucose, and gestational age at diagnosis. In this study by Jacobson et al, which is  
307 the largest numerically, glyburide was not significantly associated with a risk of macrosomia, birth weight  $>90^{\text{th}}$   
308 percentile for gestational age, hypoglycemia, or hyperbilirubinemia, compared with insulin.

309 Table 1. Observational studies comparing insulin and glyburide

|                                                       | Fines<br>2003<br>[24] | Gilson<br>2003<br>[25] | Yogev<br>2004 [26]             | Chmai<br>t 2004<br>[27] | Conway<br>2004<br>[28] | Jacobson<br>2005 [29]         | Rochon<br>2006<br>[30] | Ramos<br>2007 [31]            |
|-------------------------------------------------------|-----------------------|------------------------|--------------------------------|-------------------------|------------------------|-------------------------------|------------------------|-------------------------------|
| Study                                                 | Prosp                 | Retro                  | Retro                          | Prosp                   | Retro                  | Retro                         | Prosp                  | Retro                         |
| No. of glyburide patients                             | 40                    | 15                     | 25                             | 56                      | 63                     | 236                           | 80                     | 44                            |
| No. of insulin patients                               | 44                    | 30                     | 30                             | -                       | -                      | 268                           | 21                     | 78                            |
| No. of insulin patients<br>after failure of glyburide | -                     | -                      | -                              | 13                      | 12                     | -                             | -                      | -                             |
| Failure of glyburide                                  | -                     | -                      | -                              | 18.8%                   | 12%                    | 12%                           | 21%                    | 16%                           |
| Maternal blood glucose<br>target                      | NS                    | NS                     | NS                             | NS                      | NS                     | P<0.01<br>Gl: 86%<br>Ins: 63% | NS                     | NS                            |
| Macrosomia                                            | NS                    | NS                     | -                              | NS                      | NS                     | NS                            | NS                     | NS                            |
| Birth weight >90 <sup>th</sup><br>percentile          | -                     | -                      | -                              | -                       | -                      | NS                            | -                      | NS                            |
| Neonatal hypoglycemia                                 | -                     | -                      | -                              | -                       | -                      | NS                            | -                      | P<0.01<br>Gl: 34%<br>Ins: 14% |
| Hyperbilirubinemia                                    | -                     | -                      | -                              | NS                      | -                      | NS                            | -                      | -                             |
| Maternal hypoglycemia                                 | -                     | -                      | P=0.009<br>Gl: 28%<br>Ins: 63% | -                       | -                      | P<0.01<br>Gl: 20%<br>Ins: 8%  | -                      | NS                            |

310 Retro: retrospective studies Prosp: prospective studies Gl: glyburide Ins: insulin

311 NS: not significant; - not available

312

313 **Randomized clinical trials**314 Five randomized controlled trials comparing glyburide and insulin in the treatment of gestational diabetes  
315 have been conducted. Their results are summarized in Table 2.316 The trial by Langer et al in 2000 [21] in 404 patients showed that in 96% of cases glyburide alone  
317 achieved exactly the same glycemic control as insulin (average blood glucose during treatment 105 mg/dL±16  
318 mg/dL and 105 mg/dL±18 mg/dL for glyburide and insulin, respectively). Although the frequency of neonatal  
319 complications (macrosomia, birth weight ≥ 90<sup>th</sup> percentile for gestational age, neonatal hypoglycemia, and  
320 hyperbilirubinemia) was slightly higher in the glyburide group than in the insulin group, the between-group  
321 differences were not significant. The incidence of maternal hypoglycemia was significantly decreased in the  
322 glyburide group (2% versus 20%). However, some authors [32-34] have pointed out the lack of power of this  
323 study [21]. The main outcome was maternal blood sugar balance and the number of subjects included did not  
324 enable demonstration of large differences between insulin and glyburide in the rate of neonatal complications. A  
325 smaller, but clinically important difference could have been demonstrated with more subjects.326 Four other trials [35-38], albeit subject to methodological criticisms and including a limited number of  
327 patients (23, 51, 97, 68, respectively), have since yielded similar results on glycemic control. Neonatal morbidity  
328 criteria were not always reported in these studies (Table 2). Also, the calculation of the number of subjects  
329 needed and the main outcome were not always specified. Two trials [36, 38] reported a statistically higher  
330 frequency of macrosomia in the glyburide group than in the insulin group and 2 trials did not report this  
331 parameter [35, 37]. The frequency of children of birth weight >90<sup>th</sup> percentile for gestational age was reported in  
332 only 2 trials [36, 38], one of which reported a higher frequency in the glyburide group [36] and the other [38]  
333 found no difference between glyburide and insulin. Two trials [36, 38] reported a statistically higher frequency of  
334 neonatal hypoglycemia in the glyburide group than in the insulin group (33.3% versus 3.7% and 25% versus  
335 2.78%, respectively), one trial found no between-group difference [37], and one did not report this parameter  
336 [35].337 Langer et al [21] reported no between-group difference in hyperbilirubinemia, but this parameter was not  
338 reported in the other studies.



339

Table 2. Randomized trial comparing insulin and glyburide

|                                                       | Langer<br>2000 [21]          | Bertini 2005<br>[36]             | Silva 2007<br>[38]              | Anjalakshi<br>2007 [35] | Ogunyemi<br>2007 [37] |
|-------------------------------------------------------|------------------------------|----------------------------------|---------------------------------|-------------------------|-----------------------|
| No. of glyburide patients                             | 201                          | 24                               | 32                              | 10                      | 48                    |
| No. of insulin patients                               | 203                          | 27                               | 36                              | 13                      | 49                    |
| Failure of glyburide                                  | 4%                           | 20.8%                            | 18.75%                          | 0%                      | 6.25%                 |
| Maternal fasting and<br>postprandial blood<br>glucose | NS                           | NS                               | NS                              | NS                      | NS                    |
| Macrosomia                                            | NS                           | P<0.01<br>Gl: 16%<br>Ins: 0%     | P=0.02<br>Gl: 15.62%<br>Ins: 0% | -                       | -                     |
| Birth weight >90 <sup>th</sup><br>percentile          | NS                           | P<0.01<br>Gl: 25%<br>Ins 3.7%    | NS                              | -                       | -                     |
| Neonatal hypoglycemia                                 | NS                           | P=0.06<br>Gl: 33.3%<br>Ins: 3.7% | P=0.01<br>Gl: 25%<br>Ins: 2.78% | -                       | NS                    |
| Hyperbilirubinemia                                    | NS                           | -                                | -                               | -                       | -                     |
| Maternal hypoglycemia                                 | P=0.03<br>Gl: 2%<br>Ins: 20% | NS                               | -                               | NS                      | -                     |

Gl: glyburide Ins: insulin

NS: not significant -: not available

340

341

342

343

344

### Meta-analyses

345

346

347

348

349

350

351

352

353

354

In their 2008 meta-analysis [33], Moretti et al compared glyburide and insulin in 9 studies, one randomized [21], 4 prospective [25, 27, 39, 40] and 4 retrospective [24, 28-30], with a total of 745 women treated with glyburide and 637 treated with insulin, from 24 weeks of gestation. Moretti et al concluded that there was no difference between the 2 treatments in terms of the risk of macrosomia (OR: 1.07; 95% CI 0.78-1.47), the frequency of birth weight  $\geq 90^{\text{th}}$  percentile for gestational age (OR: 1.04; 95% CI 0.75-1.43), the rate of transfer to the neonatal unit (OR: 0.95; 95% CI 0.43-2.09), or neonatal hypoglycemia (OR: 1.24; 95% CI 0.91-1.69). The effect of treatment on maternal blood glucose control was not analyzed because this parameter was reported in only 3 studies. One of the limitations of this meta-analysis is the combination of retrospective and prospective analyses, which in theory reduces the probability of detecting a difference, even though neonatal outcomes seem to be homogeneous in the studies.

355

356

357

358

359

360

361

362

363

364

365

366

367

368

A literature review of the risks and benefits of oral antidiabetics compared with insulin therapy by Nicholson et al in 2009 [34] included in part the previous studies: 3 randomized studies comparing treatment by glyburide and insulin (n=478) [21, 35, 36], a randomized study comparing insulin and metformin (n=751) [15], and 5 observational studies (n=831) [26-30]. There was no between-group difference in blood glucose targets. The fetal or maternal prognosis was comparable with glyburide and metformin compared with insulin. Data analysis of the 3 studies comparing insulin and glyburide indicated no significant difference in birth weight.

369

### 2.7 Description of the study population

370

371

372

373

The study population will comprise pregnant women who develop gestational diabetes between 24 and 34 weeks of gestation. Only singleton pregnancies will be included as the screening thresholds for gestational diabetes for twin pregnancies are unknown. Patients with diabetes prior to pregnancy, patients diagnosed with diabetes before 24 weeks of gestation, and patients with an initial diagnosis of diabetes with a fasting blood

374 glucose >1.26 g/L are considered to have type 2 diabetes and will not be included in the study as they require  
375 urgent insulin treatment.

## 376 **2.8 What INDAO adds to published trials**

377 Although the existing data show that glyburide and insulin achieve similar maternal blood glucose control,  
378 without significant increase in maternal or neonatal adverse effects, most countries, including France (RPC  
379 [clinical practice guidelines], in press 2010), do not recommend first-line use of glyburide in the treatment of  
380 gestational diabetes. The data are considered insufficient, mainly because of methodological weaknesses: small  
381 study populations in most randomized trials without a clearly defined hypothesis and without calculation of the  
382 number of subjects needed [35-38], lack of power to demonstrate no between-treatment difference in the rate of  
383 neonatal complications in the only valid randomized trial [21] and in the meta-analyses [33, 41], studies of  
384 average quality with heterogeneity in reported criteria, small study populations, and biases inherent to  
385 observational studies [24-30, 39, 40].

386 INDAO is the first large-scale multicenter trial with well-defined goals in terms of blood glucose, designed  
387 methodologically to demonstrate glyburide's noninferiority with respect to insulin in terms of neonatal  
388 complications. The main outcome is a criterion combining morbidity criteria reflecting fetal hyperinsulinism and  
389 hence the effect of exposure to maternal hyperglycemia.

### 390 **Anticipated benefits**

391 Oral glyburide is not inferior to subcutaneous insulin in treating women with gestational diabetes who  
392 need therapy other than dietary management, notably in terms of the frequency of neonatal complications, and  
393 can be offered first line because it is easy to use. Less training is needed for one or 2 oral doses per day than  
394 for subcutaneous injections of insulin, with potentially better adherence and fewer appointments. The only real  
395 risk associated with glyburide is treatment failure, defined by failure to achieve blood glucose targets at the  
396 maximum dose, resulting therefore in a treatment switch to insulin. Trials have estimated this risk as between  
397 4% and 20.8% [21, 36-38]. Each year, approximately 16 000 women in France develop gestational diabetes and  
398 could benefit from first-line glyburide.

## 399 **2.9 Trial length and feasibility**

400 Our study will require 450 women per group (see section 10.2 for the calculation of the number of subjects  
401 needed). Because an estimated 1.5% of pregnant women with gestational diabetes require drug treatment, 60  
402 000 pregnant women will be necessary. Assuming that one in 2 women will agree to randomization, we need a  
403 population of 120 000 pregnant women. As all participating maternity units manage about 40 000 deliveries a  
404 year, recruitment can be achieved in 3 years.

## 405 **2.10 Assumption**

406 We assumed that glyburide is not inferior to insulin in treating gestational diabetes.

## 407 **2.11 Primary objective**

408 To test whether oral glyburide is not inferior to subcutaneous insulin in terms of perinatal complications in  
409 treating pregnant women with gestational diabetes requiring treatment other than dietary management.

## 410 **2.12 Secondary objectives**

411 The secondary objectives of the INDAO trial are to demonstrate the noninferiority of glyburide compared  
412 with insulin in terms of maternal blood sugar balance, rate of cesarean section, rate of premature delivery,  
413 perinatal mortality rate, rate of neonatal and maternal trauma associated with delivery, rate of respiratory  
414 distress, number of prenatal visits, number of days of hospitalization. Maternal satisfaction regarding the 2 drugs  
415 will be evaluated.

## 416 **2.13 Primary outcome**

417 The primary outcome (see also section 5.1) is a composite criterion of neonatal complications associated  
418 with gestational diabetes. Each component reflects the potential adverse effects of exposure to maternal  
419 hyperglycemia and hence of fetal hyperinsulinism. The components selected for this composite criterion are:

- 420 ➤ fetal macrosomia (>4000g) or birth weight >90<sup>th</sup> percentile for gestational age
- 421 ➤ neonatal hypoglycemia
- 422 ➤ neonatal hyperbilirubinemia

## 423 **2.14 Secondary outcomes**

424 The secondary outcomes (see section 5.1) include maternal criteria (blood sugar balance, conditions of  
425 delivery, satisfaction) and neonatal criteria.

## 426 2.15 Methodology

427 INDAO is a clinical, noninferiority, multicenter, open, randomized, balanced trial.

## 428 2.16 Experimental plan - practical considerations

### 429 Study procedure

430 The patients will be recruited among women with gestational diabetes diagnosed by hyperglycemia (75 g  
431 of oral glucose), with fasting blood glucose  $\geq 0.92$  g/L (5.1 mmol/L) and  $< 1.26$  g/L (7 mmol/L) and/or blood  
432 glucose at 1 h and 2 h after 75 g of glucose  $\geq 1.80$  g/L (10 mmol/L) and  $\geq 1.53$  g/L (8.5 mmol/L), respectively, or  
433 after 50 g of glucose with blood glucose at 1 h  $> 1.3$  g/L (7.2 mmol/L) followed by hyperglycemia (100 g of oral  
434 glucose), with fasting blood glucose  $> 0.95$  g/L (5.1 mmol/L) and  $< 1.26$  g/L (7 mmol/L) and/or blood glucose at 1  
435 h, 2 h and 3 h  $> 1.8$  g/L (10 mmol/L), 1.55 g/L (8.6 mmol/L) and 1.40 g/L (7.8 mmol/L), respectively (2 abnormal  
436 values).

437 The WHO 75-g OGTT will be favored as it is recommended in the French 2010 RPC (clinical practice  
438 guidelines) for gestational diabetes. However, the 2 screening tests will be possible to enable new practices to  
439 be integrated into some maternity units and so as not to limit patient recruitment in departments where the O'  
440 Sullivan test is still used for screening. As the inclusion criterion is failure to achieve blood glucose targets after  
441 10 days of dietary management and the randomization will be done afterwards, the patients will be comparable  
442 regardless of the screening test used.

443 The women will initially be treated by dietary management adapted to their individual needs evaluated by  
444 means of an interview. Dietary intake will be 35 kcal/kg for non-obese patients, divided into 3 meals and 2  
445 snacks, with approximately 40% to 45% of calories provided by carbohydrates, 20% by proteins, and 30-40% by  
446 fats. Dietary intake will be 25 kcal/kg in obese patients defined by a BMI  $> 30$  kg/m<sup>2</sup>. This diet will be combined  
447 with encouragement to do exercise equivalent to 30 min of walking 3 to 5 times per week, if the patient's  
448 obstetrical condition allows. The patients will be educated concerning self-monitoring of blood glucose using  
449 glucose meters, which should have a searchable memory and comply with standard ISO 15197. During the diet,  
450 monitoring will be set up as a function of the centers: self-monitoring of capillary blood glucose (4 times/day) or,  
451 after 10 days, fasting blood glucose and blood glucose 2 h after a meal.

452  
453 Patients eligible for randomization between the 2 treatments will be those whose blood glucose target is  
454 not reached, ie, those for whom at least 2 abnormal blood glucose values are recorded in one week: fasting  
455 blood glucose  $\geq 0.95$  g/L and/or postprandial blood glucose at 2 h  $\geq 1.20$  g/L after 10 days of well-conducted  
456 dietary management. In cases where there is an unusual departure from the diet, the blood glucose value  
457 following the meal in question will not be taken into account.

458  
459 Prior to the study, the patients will be informed about it and its procedures, and their written consent will  
460 be collected.

461  
462 The randomization between glyburide and insulin will be performed in each center, by the obstetrician or  
463 the diabetologist, depending on the center's organization, using the randomization module of the application  
464 CleanWEB<sup>®</sup> (Telemedicine Technologies). The patient will be managed by the diabetologist and the obstetrician  
465 in terms of treatment initiation, education, and monitoring of treatment and of capillary blood glucose.

466 The insulin and glyburide regimens will be adapted as a function of the patients' blood glucose profiles  
467 and the centers' habits regarding insulin therapy. In the 2 groups, a protocol for drug dose adjustment as a  
468 function of capillary blood glucose will be given to the patient, who will adapt the doses by performing 4 capillary  
469 blood glucose measurements per day: fasting in the morning and 2 hours after each meal. These blood glucose  
470 values will be entered in a monitoring notebook and will be available in the memory card readers. If the blood  
471 glucose targets are not achieved after a diet associated with maximum doses of glyburide over 1 week, the  
472 treatment will be replaced by insulin. If the diabetes is balanced and there are no complications, there will be no  
473 need to change obstetrical management. If gestational diabetes is unbalanced or has an effect on the fetus,  
474 delivery will be induced, taking into account the risk-benefit ratio.

475 In the framework of their usual treatment, the newborns will have a routine pediatric examination at birth,  
476 with measurement of weight, body length, and cranial circumference, and in the first 3 days of life. They will also  
477 undergo routine monitoring of capillary blood glucose and screening for jaundice.

478

## 479 Patient follow-up

## 480 Timeline and content of visits

481 Randomization and treatment initiation will be done in hospital or in the outpatient department, depending  
482 on the center's organization, at which time the obstetrician or diabetologist will collect the mother's consent. An  
483 appointment will be made with a diabetologist one week after randomization, and then at least every 2 weeks,  
484 and then, when the blood glucose target is reached and stable, every month until delivery, all this within the  
485 framework of the usual follow-up of pregnant women with gestational diabetes. Between these appointments,  
486 the patients can themselves increase the dose, as a function of capillary blood glucose readings, in line with the  
487 dose adjustment protocol given to the patient at the first appointment. Between these appointments, the patients  
488 in each center can, should they wish, have a telephone appointment or an email exchange if they have  
489 questions or doubts.

490 At each visit, capillary blood glucose values in the monitoring notebook or in the memory card reader will  
491 be analyzed. If the target is not reached, the diabetologist will increase the dose. In the event of hypoglycemia  
492 (<0.6 g/L) or symptomatic hypoglycemia, doses will be decreased to the level below. The content of these visits  
493 will not differ from that of the usual appointments for management of patients with gestational diabetes in the  
494 participating maternity units. At these appointments, checks will be made for the presence of side effects or  
495 adverse events.

496 Clinical follow-up of patients will be noted by the clinical research technician and/or the investigator in the  
497 electronic case report form (e-CRF) provided for the purpose. Also noted will be pregnancy characteristics,  
498 gestational age at diagnosis, and the dose of insulin or glyburide. At birth and in the days afterwards, the  
499 following will be recorded:

- 500 > gestational age at delivery
- 501 > method of delivery
- 502 and, if the informed parents do not refuse:
- 503 > the child's birth weight, body length, and cranial circumference
- 504 > pH and/or cord blood lactate at birth
- 505 > 5-minute APGAR score
- 506 > all endpoints
- 507 > any reasons for discontinuation or change of treatment

508

## 509 Monitoring of newborns

510 Monitoring will be identical to that generally recommended for the newborns of diabetic mothers:

511 - Weighing of children from birth

512 - Measurements: body length and cranial circumference

513 - Plotting of birth weight on growth curves [42]

514 - Early and frequent feeding from birth: breastfeeding and/or bottle feeding from 30 min of life and every 2 h or  
515 3 h.

516 - Measurement of capillary blood glucose before the first breastfeed, then before the second meal, then every 3  
517 hours; before feeding for asymptomatic newborns. Capillary blood glucose must be measured using a reader  
518 adapted to the characteristics of the newborn. Hypoglycemia must be checked by sending a blood sample  
519 collected in a fluoropolymer tube to the laboratory.

520 - The presence of abnormal clinical signs is an indication for blood glucose measurement whenever these signs  
521 are observed.

522 - If 2 consecutive capillary blood glucose values are between 45 mg/dL and 54 mg/dL (2.5 mmol/L and 3  
523 mmol/L), measurements can be made every 6 hours and stopped after 24 hours if the blood glucose values are  
524 normal and if the newborn is feeding normally.

525 - Hypoglycemia will be corrected in accordance with the local protocol.

526 - Jaundice will be screened for in accordance with the local protocol and its severity will be assessed using a  
527 bilirubin meter and/or a blood bilirubin test. The indications for phototherapy will be drawn up using the blood  
528 bilirubin curves usually applied in the department concerned, as a function of gestational age, term of delivery,  
529 and birth weight. This monitoring will not differ from that of infants born to mothers with gestational diabetes.

530

## 531 Procedures, examinations, and samples collected at visits

532 In patients included in the trial, apart from randomization and allocation of insulin or glyburide, no specific  
533 procedure and no additional examination will be done for research purposes.

534

535 Study sites

536 The INDAO trial will essentially be conducted during appointments. An outpatient visit will be possible at  
 537 some centers at initiation of treatment or when the diabetes is difficult to balance in the framework of usual  
 538 follow-up.

539 Study procedure

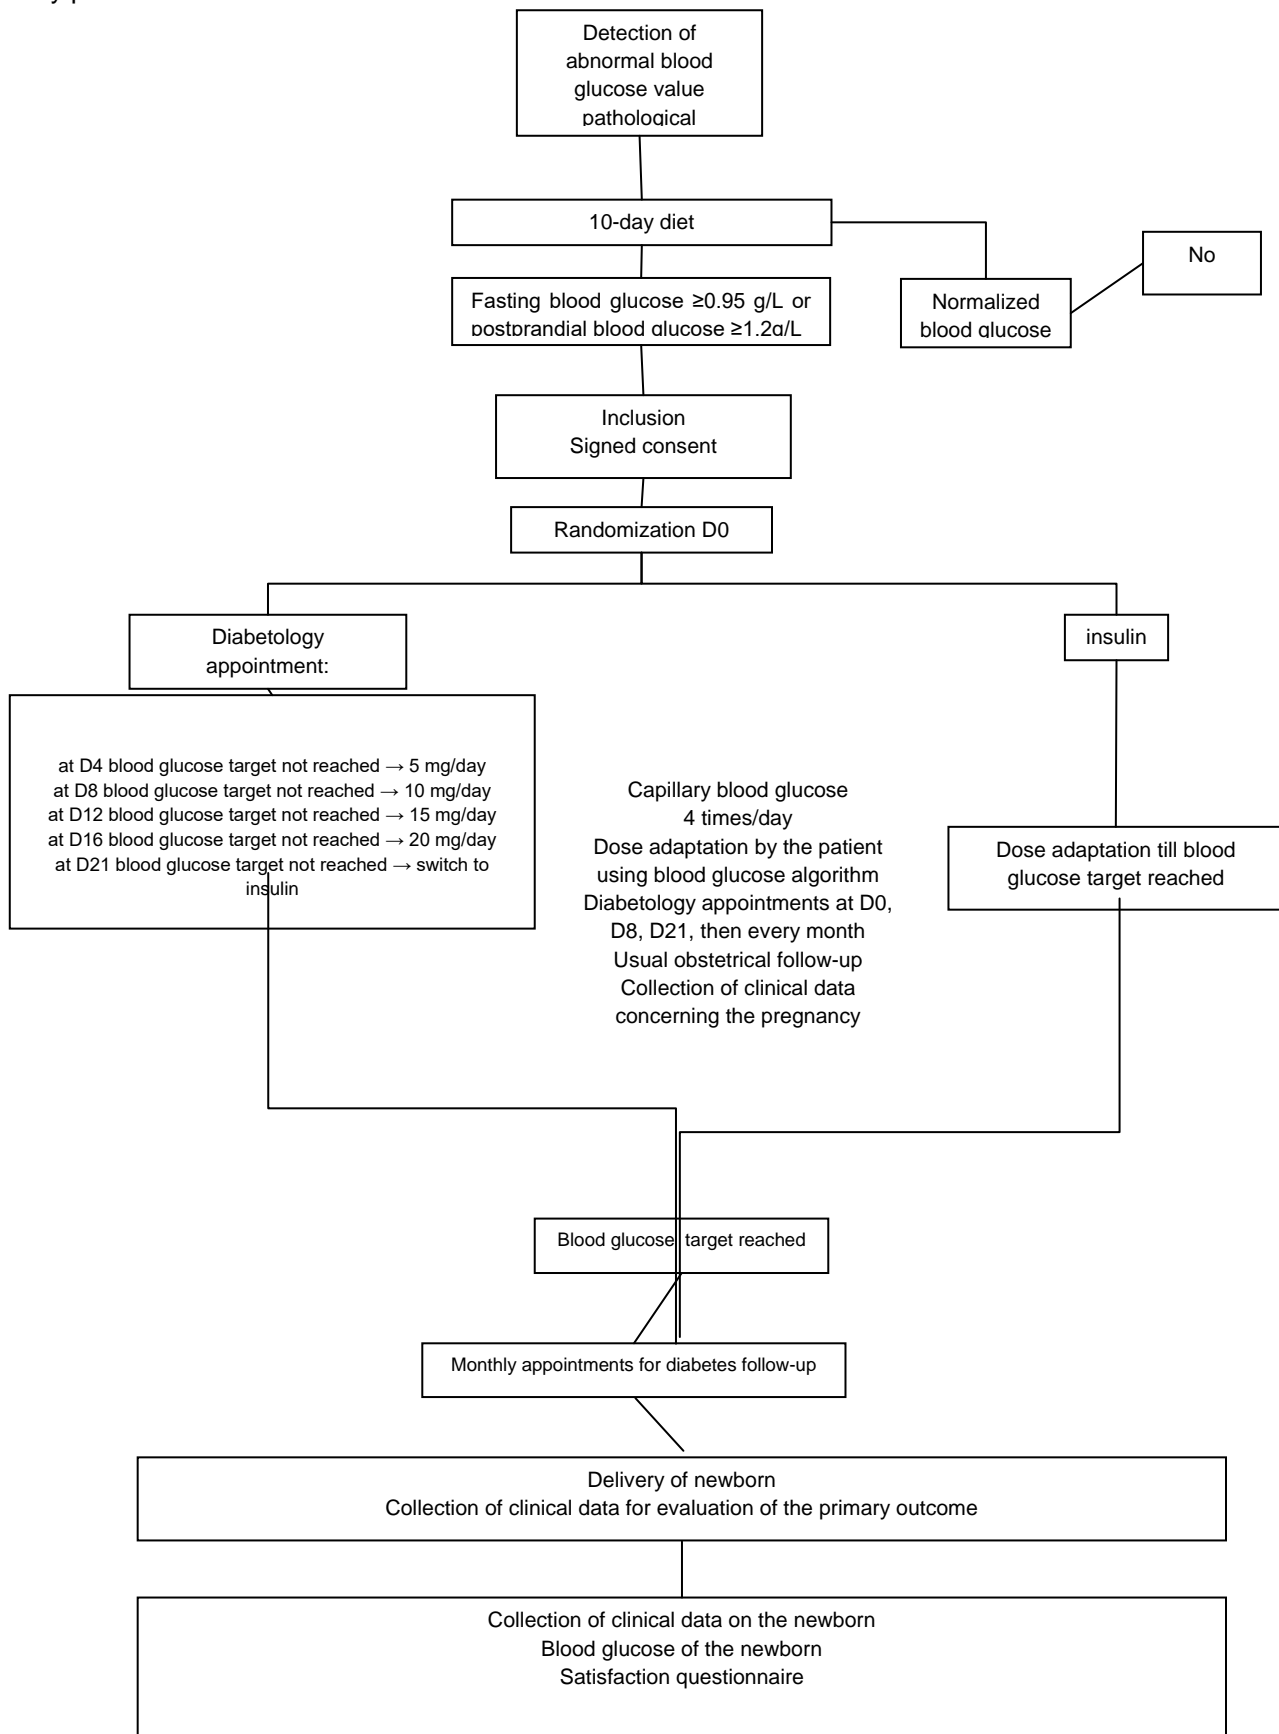

## 541 Length of participation of study participants

542 The participation of patients in the INDAO trial will extend from inclusion, after failure of dietary  
 543 management, and treatment initiation until the patient's child is discharged from the maternity unit or from the  
 544 neonatal unit.

545

## 546 Study timetable for each patient

547

| Day                         | Appointment                                 | Appointment or outpatient visit after 10-day diet                                                    | Monitoring by email or telephone if desired | Appointment 1 week after randomization | Monitoring by email or telephone if desired | Appointment at least every 15 days | Birth | Post-partum |
|-----------------------------|---------------------------------------------|------------------------------------------------------------------------------------------------------|---------------------------------------------|----------------------------------------|---------------------------------------------|------------------------------------|-------|-------------|
|                             | Abnormal blood glucose values after testing | Fasting blood glucose $\geq 0.95$ g/L or postprandial blood glucose $\geq 1.2$ g/L after 10-day diet | D4                                          | D8                                     | D12 and D16                                 | D21                                |       |             |
| Information                 | ×                                           | ×                                                                                                    |                                             |                                        | ×                                           |                                    |       |             |
| Inclusion criteria          |                                             | ×                                                                                                    |                                             |                                        |                                             |                                    |       |             |
| Consent                     |                                             | ×                                                                                                    |                                             |                                        |                                             |                                    |       |             |
| Inclusion and randomization |                                             | ×                                                                                                    |                                             |                                        |                                             |                                    |       |             |
| Genotyping CYP2C9*3         |                                             | ×                                                                                                    |                                             |                                        |                                             |                                    |       |             |
| Satisfaction questionnaire  |                                             |                                                                                                      |                                             |                                        |                                             |                                    |       | ×           |
| Adverse events              |                                             |                                                                                                      | ×                                           | ×                                      | ×                                           | ×                                  | ×     | ×           |
| Insulin or glyburide        |                                             | ×                                                                                                    |                                             | ×                                      |                                             | ×                                  |       |             |
| Primary outcome             |                                             |                                                                                                      |                                             |                                        |                                             |                                    | ×     | ×           |

548

549 **2.17 Steps taken to minimize bias**550 **2.17.1 Randomization**

551 Treatments will be allocated by means of centralized balanced randomization (randomization module of  
 552 the application CleanWEB<sup>®</sup>, Telemedicine Technologies). The randomization list (insulin versus glyburide) will  
 553 be drawn up by the statistician Mrs Armelle Arnoux of the Paris Sud clinical research unit, using reference  
 554 software (eg, NQuery Advisor<sup>®</sup>), after agreement by the study scientific director. The randomization will be  
 555 stratified by center and by blocks of random size. After the patient signs the consent form, the investigator will  
 556 record the inclusion data in the e-CRF (CleanWEB<sup>®</sup>, Telemedicine Technologies), which will enable access to  
 557 the CleanWEB<sup>®</sup> randomization module. A single number will be attributed to each patient. The use of this e-  
 558 CRF directly accessible via the Internet will facilitate the interaction between the maternity units, the  
 559 participating diabetology departments, and the various study participants.

560 Subjects who subsequently drop out will keep their inclusion number, if given one, and new subjects will always  
 561 receive a new inclusion number. The patients will therefore be identified by an alphanumeric code in the form of  
 562 "center number (3 characters) – center inclusion number (3 characters) - initials of the name and first name (1  
 563 and 1 characters)."

## 564 2.17.2 Blinding and methods used for its maintenance and code break procedure

565 The 2 treatments have different routes of administration and so blinding will not be used.

## 566 2.18 Dosage and mode of administration of the experimental drug

567 Glyburide will initially be taken in a single oral dose of 2.5 mg/day before breakfast. Dose increases will be  
568 incremental as a function of blood glucose values up to a maximum total dose of 20 mg/day, until blood glucose  
569 targets are reached (fasting blood glucose  $<0.95$  g/L and postprandial blood glucose at 2 h  $<1.20$  g/L). An  
570 algorithm for dose adaptation depending on capillary blood glucose values will be given to the patient at the  
571 instruction session. In the event of at least 2 abnormal values (fasting blood glucose  $\geq 0.95$  g/L and/or  
572 postprandial blood glucose at 2 h  $\geq 1.20$  g/L), the dose will be increased by the patient at D4 to 5 mg in the  
573 morning. At D8, the patient will have a review appointment with the diabetologist. If there are still 2 abnormal  
574 values, the dose will be increased to 5 mg in the morning and 5 mg in the evening before dinner. At D12, if there  
575 are still 2 abnormal values, the patient will increase the dose to 10 mg in the morning and 5 mg in the evening,  
576 up to a maximum dose of 10 mg in the morning and 10 mg in the evening at D16. If there is a deviation from the  
577 usual diet, the blood glucose value following the meal in question will not be taken into account.

578 The patient will have a diabetology appointment on D21: switch to insulin if the blood glucose targets are not  
579 reached. The patient can use monitoring by telephone or by email at D4, D12 and D16 or if she experiences  
580 side effects between appointments. In cases of symptomatic hypoglycemia or of blood glucose  $<0.6$  g/L, the  
581 glyburide dose will be decreased or returned to the previous level. Treatment will be continued until delivery.

## 582 2.19 Description of the experimental drug

583 Glyburide

584 Glyburide is marketed as Daonil® scored 5 mg tablets by Sanofi-Aventis France, which has the marketing  
585 authorization. Treatments will be labeled by the Clinical Trials Unit of the Agence Générale des Equipements et  
586 Produits de Santé (AGEPS; medicines and healthcare products regulatory agency) with the regulatory texts for  
587 drugs used in clinical trials. Removable labels will be attached to the boxes, to ensure the traceability of  
588 dispensing.

## 589 2.20 Description of the reference drug

590 Insulin

591 The protocol will be adapted as a function of the department's usual practice. As the insulin will be used  
592 as per the marketing authorization indications and in the framework of usual follow-up, it will not be supplied by  
593 the sponsor but rather will be bought in the community pharmacy.

## 594 2.21 Experimental drug accountability procedures

595 The clinical research assistant representing the study sponsor will check management of stocks when  
596 conducting on-site monitoring visits. The study drugs will be kept in a safe, reserved access site. The contents  
597 of the different drug packages will not be mixed.

598 For each patient, all information on the administration of the treatment received (date, time, dose) will be noted  
599 in the paper records and in the e-CRF and in the dispensing follow-up notebook. The investigator undertakes to  
600 deliver these products only to patients participating in the study and agrees to return to the sponsor, at the end  
601 of the study, all original packaging, whether empty or containing unused drugs, in accordance with the  
602 instructions of the study monitor. It is also agreed that the investigator will neither deliver these drugs to sites  
603 nor keep them at sites other than those agreed with the sponsor.

## 604 2.22 Duration of the research

605 Patients with gestational diabetes requiring drug treatment will be included between 24 and 34 weeks of  
606 gestation. They will take part from inclusion and treatment initiation until their child is discharged from the  
607 maternity unit or the neonatal unit, ie, a maximum of 24 weeks. The total duration of the study will be 3.5 years  
608 (3 years of recruitment and 24 weeks of follow-up).

## 609 2.23 Rules for temporary or definitive withdrawal

### 610 2.23.1 Interruption of participation in the research

611 Patients can end their participation in the research if they so wish at any time and for any reason, or as  
612 decided by the investigator. This will in no way alter the quality of their subsequent healthcare.

613 Procedures for follow-up of drop-outs

614 All drop-outs should be documented and the investigator should indicate the reason for drop-out. For  
 615 patients lost to follow-up, the CRF should be completed up to the last visit. The investigator will make every  
 616 possible effort to contact the patient and to establish the reason for her withdrawal from the trial and her state of  
 617 health.

#### 618 Consequences of drop-outs

619 The patients who drop out will not be re-included in the study and their treatment numbers will not be re-  
 620 used. These patients will be followed up in the maternity unit outside the protocol.

#### 621 Lost to follow-up

622 The risk of patients lost to follow-up is very low because there is a small probability that a woman treated  
 623 for gestational diabetes will give birth in another maternity unit. The investigator will make every possible effort  
 624 to obtain news about the patient.

### 625 2.23.2 Discontinuation of all or part of the research

626 Only unanticipated serious adverse events in the glyburide arm of the study will be a reason to stop the  
 627 research. As glyburide is well known and used in diabetic patients, the likelihood of this happening is low.

## 628 3 SELECTION OF RESEARCH PARTICIPANTS

### 629 3.1 Inclusion criteria

630 The eligibility criteria are:

- 631 ➤ Pregnant woman
- 632 ➤ Aged 18 to 45
- 633 ➤ Diagnosis of gestational diabetes between 24 and 34 weeks of gestation, by either:
  - 634 ○ 75-g OGTT

635 Fasting blood glucose  $\geq 0.92$  g/L (5.1 mmol/L) and  $< 1.26$  g/L (7 mmol/L) and/or blood glucose at 1 h and 2 h  
 636 after 75 g of glucose  $\geq 1.80$  g/L (10 mmol/L) and  $\geq 1.53$  g/L (8.5 mmol/L), respectively, or

- 637 ○ 50-g OGTT

638 Blood glucose at 1 h  $> 1.30$  g/L (7.2 mmol/L) followed by 100-g OGTT with fasting blood glucose  $> 0.95$  g/L (5.1  
 639 mmol/L) and  $< 1.26$  g/L (7 mmol/L) and/or blood glucose at 1 h, 2 h and 3 h  $> 1.8$  g/L (10 mmol/L), 1.55 g/L (8.6  
 640 mmol/L) and 1.40 g/L (7.8 mmol/L), respectively (2 abnormal values).

- 641 ➤ Complete, 10-day dietary management: treatment by dietary management adapted to the woman's  
 642 individual needs evaluated at a dietary interview. Dietary intake will be 35 kcal/kg for non-obese  
 643 patients, divided into 3 meals and 2 snacks, with approximately 40% to 45% of calories provided by  
 644 carbohydrates, 20% by proteins, and 30% to 40% by fats. Dietary intake will be 25 kcal/kg in obese  
 645 patients defined by a BMI  $> 30$  kg/m<sup>2</sup>. This diet will be combined with encouragement to do exercise  
 646 equivalent to 30 min of walking 3 to 5 times per week, if the patient's obstetrical condition allows. The  
 647 patients will be instructed concerning self-monitoring of blood glucose using glucose meters, which  
 648 should have a searchable memory and comply with standard ISO 15197. During the diet, monitoring will  
 649 be set up as a function of the centers: self-monitoring of capillary blood glucose (4 times/day) or, after  
 650 10 days, fasting blood glucose and blood glucose 2 h after a meal.

651 The patients included are

- 652 ➤ Eligible patients with blood glucose targets not reached, ie, those for whom at least 2 abnormal blood  
 653 glucose values were noted after 10 days of well-conducted dietary management: fasting blood glucose  
 654  $\geq 0.95$  g/L and/or postprandial blood glucose at 2 h  $\geq 1.20$  g/L.

### 656 3.2 Non-inclusion criteria

- 657 ➤ Multiple pregnancy
- 658 ➤ Chronic hypertension
- 659 ➤ Preeclampsia
- 660 ➤ Proven renal insufficiency
- 661 ➤ Proven hepatic insufficiency
- 662 ➤ Long-term corticosteroid treatment
- 663 ➤ Suspected sulfonylurea allergy
- 664 ➤ Diabetes prior to pregnancy
- 665 ➤ Abnormal value in screening for gestational diabetes before 24 weeks of gestation
- 666 ➤ Fasting blood glucose  $\geq 1.26$  g/L at initial diagnosis of diabetes



- 667 ➤ The need, in addition to glyburide, for a drug treatment that is contraindicated or inadvisable  
668 ➤ Poor understanding of the French language  
669 ➤ No social security coverage

### 670 3.3 Exclusion criteria

671 The discovery in a patient included of a non-inclusion criterion during the study will lead to the exclusion  
672 of the patient.

### 673 3.4 Simultaneous participation in other research, exclusion period

674 Patients cannot take part in other research during their participation, except for the ancillary studies  
675 described in section 10.

## 676 4 TREATMENTS ADMINISTERED

### 677 4.1 Treatments necessary for the research

#### 678 4.1.1 Experimental treatment (glyburide)

679 Nature of the treatment

680 Glyburide is available as scored 5 mg tablets (Daonil®) from Sanofi Aventis. It is authorized in France for  
681 the treatment of type 2 diabetes. The information leaflet is given in Appendix 18.5.

682 Modes of administration

683 **Glyburide:** The oral dose of glyburide will initially be 2.5 mg/day before breakfast and will be increased  
684 incrementally as a function of blood glucose values up to a maximum of 20 mg/day until blood glucose targets  
685 are reached (fasting blood glucose <0.95 g/L and postprandial blood glucose at 2 h <1.20 g/L). An algorithm for  
686 dose adaptation depending on capillary blood glucose values will be given to the patient at the instruction  
687 session. In the event of at least 2 abnormal values (fasting blood glucose ≥0.95 g/L and/or postprandial blood  
688 glucose at 2 h ≥1.20 g/L), the dose will be increased by the patient at D4 to 5 mg in the morning. At D8, the  
689 patient will have a review appointment with the diabetologist. If there are still 2 abnormal values, the dose will be  
690 increased to 5 mg in the morning and 5 mg in the evening before dinner. At D12, if there are still 2 abnormal  
691 values, the patient will increase the dose to 10 mg in the morning and 5 mg in the evening, up to a maximum  
692 dose of 10 mg in the morning and 10 mg in the evening at D16. If there is a deviation from the usual diet, the  
693 blood glucose value following the meal in question will not be taken into account. The patient will have a  
694 diabetology appointment on D21: switch to insulin if the blood glucose targets are not reached. The patient can  
695 use monitoring by telephone or by email at D4, D12 and D16 or if she experiences side effects between  
696 appointments. In cases of symptomatic hypoglycemia or of blood glucose <0.6 g/L, the glyburide dose will be  
697 decreased or returned to the previous level. Treatment will be continued until delivery.

698  
699 Authorized and prohibited drugs and treatments

700 Contraindicated:

701 Miconazole (systemic route, oral gel)

702 Not recommended:

703 ▪ Phenylbutazone (for all dosage forms, including topical)

704 ▪ Alcohol

705 Require precautions for use:

706 ▪ Beta-blockers

707 ▪ Fluconazole

708 ▪ Clarithromycin, erythromycin

709 In all cases, the alternative treatment will be insulin.

#### 710 4.1.2 Reference treatment (insulin)

711 Nature of the treatment

712 The insulin treatment regimen will be adapted as a function of each department's usual practice and  
713 according to capillary blood glucose values within the framework of the patient's usual treatment.

### 714 4.2 Methods for monitoring adherence to treatment

715 Treatment will be noted in a monitoring notebook. Capillary blood glucose values will available in this  
716 notebook and also in the memory card reader. At appointments, the diabetologist and/or obstetrician can check  
717 adherence to treatment using the monitoring notebook, which will be produced by the Paris Sud clinical  
718 research unit. Each sheet will be in duplicate, the copy being for subsequent data entry by the clinical research

719 technician. This notebook will be kept by the patient. At each appointment, the investigator will collect the  
720 completed duplicate sheets and will give them to the clinical research technician, who will then enter the data.

### 721 **4.3 Provision of the experimental drug**

722 Glyburide 5 mg;

723 Labeling:

724 Treatment will be labeled by the Clinical Trials Unit of the Agence Générale des Equipements et Produits  
725 de Santé (AGEPS) with the regulatory texts for drugs used in clinical trials. Removable labels will be attached to  
726 the boxes, to ensure the traceability of dispensing.

727 Supply and restocking

728 At the start of the study, the AGEPS will supply the treatment (Daonil®) to the pharmacies of the  
729 participating centers. An initial stock of treatment units will be made available as a function of the number of  
730 potential patients. If necessary, AGEPS will restock at the request of the participating centers' pharmacies.

731 Monitoring of dispensing

732 A notebook for monitoring the dispensing of treatment will be made available for the study in each  
733 pharmacy and will be completed by the clinical research assistant.

734 Insulin:

735 Dispensing:

736 The boxes of insulin will be dispensed in accordance with their marketing authorization by community  
737 pharmacies or by the pharmacies of the participating centers.

### 738 **4.4 Treatment discontinuation procedure**

#### 739 **4.4.1 Criteria and methods for treatment discontinuation or patient exclusion**

740 Glyburide will be stopped and replaced by insulin if it fails.

741 Glyburide will be replaced by insulin if it fails to achieve blood glucose targets (at least 2 abnormal blood  
742 glucose values: fasting blood glucose  $\geq 0.95$  g/L and/or postprandial blood glucose at 2 h  $\geq 1.20$  g/L) for one  
743 week at the maximum dose of 20 mg/day. The patients will remain in the study.

#### 744 **4.4.2 Data collection methods and timetable**

745 The decision to stop treatment can be taken at an appointment for blood glucose monitoring or at an  
746 obstetrical appointment.

747 Procedures for follow-up of drop-outs

748 All drop-outs should be documented and the investigator should indicate the reason for drop-out. For  
749 patients lost to follow-up, the CRF should be completed up to the last visit. The investigator will make every  
750 possible effort to contact the patient and to establish the reason for her withdrawal from the trial and her state of  
751 health.

752 Consequence of drop-outs

753 Patients who drop out will not be re-included in the study and their treatment numbers will not be re-used.  
754 These patients will be followed up in the maternity unit outside the protocol.

#### 755 **4.4.3 Modalities for replacement of drop-outs, if necessary**

756 When a patient's glyburide treatment is discontinued, it will be replaced by insulin, as treatment of  
757 gestational diabetes is considered necessary. Follow-up of these patients in the study will continue.

#### 758 **4.4.4 Modalities of follow-up of drop-outs**

759 Patients who drop out will be followed up in the department, outside the protocol. In cases where there is  
760 a change of treatment, follow-up of such patients will continue in the research.

#### 761 **6.4.5 Recording of refusals and exclusions**

762 Patients who refuse randomization and patients who are excluded by their characteristics will also be  
763 recorded (registry).

764

### 765 **4.5 Integration of INDAO in the management of patients with gestational diabetes**

766 When the blood glucose target is not reached after 10 days of well-conducted dietary management, the  
767 reference treatment is subcutaneous insulin. The INDAO protocol proposes to test glyburide, a treatment of type  
768 2 diabetes outside pregnancy, in this indication.

769 Inclusion in INDAO in no way changes the usual treatment of patients with gestational diabetes. The  
 770 intervention consists of treatment with glyburide (experimental drug) or with insulin (according to the  
 771 recommendations for management of gestational diabetes), but the treatment frequency, type of appointment,  
 772 blood glucose monitoring, monitoring of pregnancy, delivery and monitoring of newborns are the same  
 773 regardless of the treatment group generated by randomization. The study results in no change in the usual  
 774 treatment for the end of pregnancy.

## 775 **5 EVALUATION OF EFFICACY**

### 776 **5.1 Parameters for evaluation of efficacy**

#### 777 **5.1.1 Primary outcome**

778 The primary outcome is a composite criterion comprising neonatal complications associated with gestational  
 779 diabetes. Each parameter reflects the potential adverse effects of exposure to maternal hyperglycemia and  
 780 hence of fetal hyperinsulinism. The parameters selected for this composite criterion are fetal macrosomia or  
 781 birth weight >90<sup>th</sup> percentile for gestational age, neonatal hypoglycemia, and neonatal hyperbilirubinemia.

- 782 ➤ Macrosomia is defined as birth weight >4000 g or birth weight >90th percentile for gestational age. The  
 783 birth weight percentiles are those of published growth curves [42].
- 784 ➤ Hypoglycemia will be taken into account in the analysis for a blood glucose value <36 mg/dL  
 785 ➤
- 786 ➤ (<2 mmol/L) after 2 h of life or a value <45 mg/dL (2.5 mmol/L) associated with clinical signs suggestive of  
 787 hypoglycemia and resolved by glucose administration. Hypoglycemia detected using a blood glucose  
 788 test strip will be confirmed by a laboratory assay of a blood sample collected in a fluoropolymer tube.  
 789 The presence of abnormal clinical signs is an indication for measurement of blood glucose whenever  
 790 these clinical signs are observed.
- 791 ➤ The blood glucose value in the 1<sup>st</sup> hour of life before the 1<sup>st</sup> breastfeed will be collected as information but  
 792 will not be taken into consideration in defining hypoglycemia, as the norm for this value is unknown. This  
 793 value will, however, be compared between the 2 groups.
- 794 ➤ Hyperbilirubinemia will be taken into account in the analysis if a treatment is initiated with phototherapy or  
 795 by other therapeutic means and if no pathological cause of jaundice is found (ABO incompatibility,  
 796 G6PD deficiency, hematoma, other). Its frequency will be compared in the 2 groups.

#### 797 **5.1.2 Secondary outcomes**

798 Maternal criteria:

- 799 ➤ Maternal blood sugar balance evaluated using the average fasting blood glucose and postprandial blood  
 800 glucose between diagnosis and delivery
- 801 ➤ Number of episodes of maternal hypoglycemia defined by blood glucose <0.6 mg/dL and/or a clinical  
 802 episode
- 803 ➤ Rate of failure of glyburide (number of patients requiring insulin after maximum doses of glyburide)
- 804 ➤ Rate of cesarean section
- 805 ➤ Rate of premature delivery
- 806 ➤ Rate of 3rd and 4th degree perineal tears
- 807 ➤ Maternal satisfaction evaluated using a questionnaire

808 Neonatal criteria:

- 809 ➤ Rate of neonatal trauma associated with delivery (shoulder dystocia, fracture, bone trauma, elongation of  
 810 the brachial plexus)
- 811 ➤ Rate of respiratory distress: need for respiratory support and/or oxygen therapy beyond 2 hours of life
- 812 ➤ Other neonatal criteria  
 813 Ponderal index: Birth weight (g)/ Size cm<sup>3</sup> X100  
 814 pH <7, lactate, base deficit >10, measured using cord blood  
 815 Rate of neonatal mortality  
 816 Rate of transfer to pediatrics or neonatal intensive care

817 Other criteria

- 818 ➤ Number of prenatal obstetric visits
- 819 ➤ Number of diabetology appointments
- 820 ➤ Number of days spent in hospital pre- and postnatally

## 5.2 Methods and timetable for the measurement, recording, and analysis of parameters for evaluation of efficacy

All study outcomes and data will be recorded using the CleanWEB® e-CRF. Data on the children will be collected if the previously informed parents voice no opposition. This CRF will be used by the investigator or the clinical research technician to record the follow-up of patients at appointments. Data recorded will include pregnancy characteristics, gestational age at diagnosis, dose of insulin or of glyburide, gestational age at delivery, method of delivery, birth weight, pH at birth, 5-minute APGAR score, and all endpoints as well as the reasons for any discontinuation or change of treatment.

A paper notebook (duplicate pages) will be used to record the patient's treatment (insulin or glyburide) and the doses received. The data collected at follow-up appointments with the diabetologist and data recorded by the pediatrician at birth will be entered in a paper CRF. The clinical trial technician will subsequently enter these data in the e-CRF.

## 6 ASSESSMENT OF SAFETY

### 6.1 Description of parameters of safety assessment

#### 6.1.1 Adverse event

Any untoward medical occurrence that may present in a person taking part in biomedical research, whether or not it has a causal relationship with the product used in the research.

#### 6.1.2 Adverse reaction

Any noxious and unintended response to an experimental drug, whatever the dose administered.

#### 6.1.3 Serious adverse event or effect

Any adverse event or effect of a drug, irrespective of the dose administered, that results in death, is life-threatening, requires inpatient hospitalization or prolongation of existing hospitalization, results in persistent or significant disability/incapacity, or is a congenital anomaly/birth defect.

#### 6.1.4 Unexpected adverse reaction to an experimental drug

An adverse reaction the nature, severity, or progression of which is inconsistent with the summary of product characteristics, when the drug is authorized, or with the investigator brochure, when it is not authorized.

#### 6.1.5 New finding

Any new safety finding that could lead to reassessment of the risk-benefit ratio of the research or of the experimental drug, or which could be sufficient to envisage changes in the administration of the experimental drug or in the conduct of the research.

### 6.2 Adverse reactions to treatment

Expected adverse reactions associated with glyburide:

- Metabolic and nutritional disorders:

- Hypoglycemia: skin and subcutaneous tissue disorders
- Mucocutaneous eruptions: pruritus, urticaria, maculopapular
- Some cases of photosensitization have been reported

- Immune system disorders:

- Manifestations of hypersensitivity, such as bronchospasm, hypotension, or even shock.

- Gastrointestinal disorders:

- Nausea, diarrhea, epigastric pain

- Hepatobiliary disorders:

- Increased liver enzymes with the possibility of cytolytic or cholestatic hepatitis requiring treatment discontinuation. Can progress to life-threatening liver failure

- Blood and lymph system disorders:

- Blood disorders generally reversible on treatment discontinuation:
  - Hypereosinophilia, leukopenia, moderate or severe thrombocytopenia that presents as purpura
  - More rarely: agranulocytosis, hemolytic anemia, medullary aplasia, and pancytopenia

- Investigations:

- Hyponatremia (isolated cases)
- Occasional moderate increases in blood urea and creatinine

871  
872  
873  
874  
875  
876  
877  
878  
879  
880  
881  
882  
883  
884  
885  
886  
887  
888  
889  
890  
891  
892  
893  
894  
895  
896  
897  
898  
899  
900  
901  
902  
903  
904  
905  
906  
907  
908  
909  
910  
911  
912  
913  
914  
915  
916  
917  
918  
919  
920  
921  
922  
923  
924

- Eye disorders:

- Transient visual disturbances such as blurred vision or visual accommodation disturbances, especially at the start of treatment, with or without blood glucose variation

Expected adverse reactions associated with insulin therapy:

- Hypoglycemia is the most frequent adverse reaction during insulin therapy of the diabetic patient. Severe hypoglycemia can lead to loss of consciousness and, in extreme cases, death. Hypoglycemia can result from excess insulin and other factors, such as food intake and energy expenditure. No frequency of onset of hypoglycemia can be presented.

- Local allergy is frequent (1/100 to <1/10). Redness, edema, and itching can occur at the injection site.

- Systemic allergy, which is very rare (<1/10 000) but potentially more serious, corresponds to generalized allergy to insulin. It can lead to generalized eruption over the whole body, dyspnea, wheezing, drop in blood pressure, fast heartbeat, or sweating. Severe generalized allergy can be life-threatening. The rare cases of severe allergy to Humulin® must be treated immediately. A change of insulin or desensitization may be necessary.

- Lipodystrophy at the injection site is infrequent (1/1000 to <1/100).

### **6.3 Methods and timetable for measuring, recording, and analyzing safety assessment parameters - Study committees**

Steering committee

This committee will comprise the clinicians who initiated the project, the biostatistician in charge of the project, the clinical research unit representative appointed for this research, and the department of clinical research and development representative. It will define the general research organization and procedures and will coordinate data. It will initially determine the methodology and, during the research, will decide how to deal with unforeseen situations and will monitor the research, in terms of safety and adverse events, in particular.

Scientific committee

This committee will comprise those who helped draw up and write the protocol. It will be consulted during the trial to take stock of progress and for analysis of the results.

Independent monitoring committee

This committee will comprise a group of experts who supervise the clinical trial data concerning the safety of patients and the efficacy of treatment. Notably, the committee will be in charge of monitoring any severe adverse effects that occur. The committee can recommend discontinuation of the trial following evaluation of the results. It can also decide to stop the trial for reasons of patient safety, inefficacy compared with the reference treatment, or a clinical benefit much greater than that of the reference treatment. This independent committee will meet periodically to assess progress, safety data, and determinant events in terms of efficacy. It will comprise Prof François Goffinet, gynecologist-obstetrician at the Port Royal maternity unit, Dr Vincent Gadjos, pediatrician at the Hôpital Antoine Béclère, and Dr Eric Pussard, pharmacologist, at the Hôpital Bicêtre.

### **6.4 Adverse event reporting**

Non-serious adverse events:

Any non-serious adverse event (see definition above) observed during or after the research should be noted in the CRF in the section provided for the purpose. A single event should be reported per item. The event can correspond to a symptom, diagnosis, or the result of a complementary examination deemed significant. All clinical or laboratory data that help describe the event in question should be recorded.

Serious adverse events:

The investigator must immediately notify the sponsor, the Paris public hospital system, of any serious adverse events as defined above. The investigator completes the serious adverse events form (of the study CRF) and faxes it (no. 01 44 84 17 99) to the clinical research and development department within 48 hours (after, if possible, an immediate telephone call [01 44 84 17 23] in cases of death or life-threatening condition). The investigator must also inform the clinical research unit in charge of the research of any serious adverse events.

For each serious adverse event, the investigator must give an opinion on the causal relationship of the event with the experimental drug (glyburide), with insulin, or with any other treatments. For the initial declaration, the time available may be insufficient to obtain information regarding the description and evaluation of an

925 adverse event. Should the death of a participant occur during the research, the investigator will send the  
926 sponsor all additional information requested (hospital report, autopsy findings, etc.).

927 The sponsor must be informed of any new finding in the research or in the context of the research,  
928 provided by the research itself or from the scientific literature.

929 - Reporting of serious adverse events to the health authorities

930 The pharmacovigilance unit of the clinical research and development department will report serious  
931 adverse events to the health authorities, after evaluation of their seriousness, the causal relationship with the  
932 experimental drug, with insulin, and with any other treatments, and the unexpected nature of the adverse  
933 events. The sponsor will notify the appropriate health authorities of any suspected unexpected serious adverse  
934 event within the legally stipulated timeframe. Any safety data or new finding that could significantly affect the  
935 evaluation of the risk-benefit ratio of the experimental drug, or of the research, or which could lead to changes  
936 concerning the administration of the drug or the conduct of the research, will be sent by the sponsor to the  
937 appropriate health authorities, the ethics committee, and the study investigators.  
938

## 939 **6.5 Modalities and duration of follow-up of patients after adverse events**

940 Any patient presenting an adverse event must be followed up until the event is resolved or stabilized.

941 - If the event is not serious, progress will be noted on the corresponding page of the CRF in the section  
942 provided for the purpose.

943 - If the event is serious, a serious adverse event follow-up report will be sent to the clinical research and  
944 development department.

# 945 **7 STATISTICS**

## 946 **7.1 Data analysis**

947 Data will be entered progressively as the trial advances, overseen by the investigator, using CleanWEB®  
948 software. The statistical analysis will be done using STATA (College Station, TX USA). Methodological and  
949 statistical aspects will be managed by the Epidemiology of Reproduction and Child Development team at the  
950 Epidemiology and Population Health research center (Inserm Unit 1018), under the responsibility of Jean  
951 Bouyer.

952 The glyburide group will be compared with the insulin group in terms of the patients' demographic,  
953 obstetrical, and medical characteristics. The glyburide and insulin groups will be compared in terms of the  
954 composite endpoint (primary study outcome) by calculating the confidence interval of the percentage difference  
955 between the 2 groups. It will be concluded that glyburide treatment is not inferior to insulin therapy if this  
956 confidence interval does not contain the value 7%, which has been selected as the limit of equivalence.

957 If, despite randomization, the 2 groups are unbalanced for one or more demographic, obstetrical, or  
958 medical variables, an adjustment will be made by logistic regression [44]. All tests and confidence intervals will  
959 be done with a 5% risk of error.

960 The usual recommendations for a clinical trial are an intention to treat analysis [45]. However, for a noninferiority  
961 trial this type of analysis can reduce the apparent deviation between the treatments and so incorrectly indicate  
962 noninferiority. A per protocol analysis is therefore recommended. Both analyses will be done because they yield  
963 complementary information. More weight will be given to the per protocol analysis. The results will be all the  
964 more convincing if the results of the 2 types of analysis agree.

965 It was decided not to perform interim statistical analyses because this would require an increase in the number  
966 of subjects included.

## 967 **7.2 Planned number of people to be included in the research**

968 The number of subjects needed was calculated using the primary outcome. The frequency of neonatal  
969 complications was estimated using literature data [33, 34, 41] on women presenting gestational diabetes treated  
970 with insulin as well as local data from maternity units over an 18-month period. The estimated frequency was  
971 approximately 18%.

972 The aim was to show that glyburide treatment was not less effective than insulin therapy, which is  
973 equivalent to determining a maximum difference that can be tolerated to conclude that the new treatment  
974 (glyburide) is not less effective than the reference treatment (insulin). This difference must be small enough to  
975 have no clinical significance.

976 To calculate the number of subjects needed, we set this difference at 7%, ie, glyburide treatment is not  
977 considered to be less effective than insulin therapy if the frequency of the composite endpoint does not exceed

25% with glyburide (when it is 18% with insulin). To guarantee a power of 80% (with a 5% threshold of significance), we therefore need 372 subjects per group. In considering that about 20% of the patients treated with glyburide will not reach the defined blood glucose targets and will be switched to insulin, 450 subjects per group will be necessary.

The estimated percentage of pregnant women with gestational diabetes who require drug treatment is 1.5%, so 60 000 pregnant women will be necessary. Assuming that one in 2 women will agree to randomization, we need a population of 120 000 pregnant women. Given that the participating maternity units manage about 40 000 deliveries per year, recruitment should be complete in 3 years.

The distribution of subjects per center is not fixed and will depend on recruitment, which is a function of the number of pregnant women followed up and the real percentage of acceptance of the trial by the patients. The only restriction is the balance between the groups in each center, which is ensured by the fact that the randomization is stratified by center.

### 7.3 Missing data

If necessary, the characteristics of patients lost to follow-up will be studied and compared with those of the patients who are followed up. A sensitivity analysis will be used to determine to what extent the results of the study may have been influenced by this lack of information.

In cases of missing data, the analysis will be done using the classic complete-case method, ie, by considering only subjects without missing data. Multiple imputation methods can also be used as an analysis of sensitivity as, even if the methodology is under development, the assumptions of these methods are less strong than those of the complete-case analysis.

### 7.4 Choice of patients to be included in the analysis

The per protocol analysis will only include patients who followed the treatment allocated to them by randomization. Patients who switched to insulin from glyburide because the latter was ineffective will be excluded from the per protocol analysis. The characteristics of the patients excluded from the per protocol analysis will be clearly described. The intention to treat analysis will be used to study the 2 groups of patients as defined by the randomization.

### 7.5 Transcription of data in the case report form

An e-CRF will be configured for this study by Laure Coutard, the data manager of the Paris-Sud Clinical Research Unit, in collaboration with the investigator/coordinator and the biostatistician. The data will be recorded:

- Directly in the e-CRF for data relating to inclusion, which allow the randomization of patients
- In paper documents (in duplicate), which will constitute the source medical data and which the clinical research technician will subsequently enter in the e-CRF:
  - The patient monitoring records of the treatment initially allocated by randomization (insulin or glyburide) and the doses received
  - The data collected at the follow-up appointment with the diabetologist
  - The data collected by the pediatrician at birth

All information required by the protocol must be noted in the CRF along with the investigator's explanation of any missing data. The data, whether laboratory or clinical, must be transferred into the CRF as they are recorded.

Patient anonymity will be ensured by the use of a code number and the patient's initials on all documents necessary to the research, or by using appropriate means to erase named data on copies of source documents intended for documentation of the research.

## 8 ETHICAL CONSIDERATIONS

The sponsor is defined by the French law no. 2004-806 of 9 August 2004 and is the Paris public hospital system. Regulatory considerations will be taken care of by the Department of Clinical Research and Development.

Before starting the research, each investigator will provide the research sponsor's representative with a signed curriculum vitae bearing his or her French Medical Association registration number.

### 8.1 Application to AFSSAPS for authorization

To start the research, the clinical research units as sponsor must apply for authorization from AFSSAPS, the competent authority as defined in Public Health Code article L. 1123-12, which gives its opinion regarding the safety of this biomedical research involving human subjects, notably in terms of the safety and quality of the medicinal products used during the research in accordance with, where necessary, the references/norms in force, the conditions for their use, and the safety of the human subjects in terms of the procedures and methods used, as well as the planned modalities for follow-up of the subjects.

## 8.2 Submission of the protocol to the ethics committee

In accordance with article L.1123-6 of the Public Health Code, the research protocol must be submitted by the sponsor to an ethics committee, the opinion of which is conveyed to the competent authority by the sponsor before the research starts.

# 9 DECLARATION TO THE FRENCH DATA PROTECTION AUTHORITY

Under French law, before the research starts the French Data Protection Authority (CNIL) must be sent the computer file used to collect personal data for the research. In January 2006, the CNIL established a reference methodology specific to the processing of personal data in the context of biomedical research, as defined by law no. 2004-806 of 9 August 2004, because it comes within the scope of article L.1121-1 et seq. of the Public Health Code.

This methodology enables a simplified notification procedure when the nature of the data collected in the research is compatible with the list drawn up by the CNIL in its reference document.

## 9.1 Information note and informed consent

Written consent will be collected from every woman who participates in the research before any procedure required by the research is performed. The study obstetrician or diabetologist will inform patients beforehand about the study. After a period of reflection, the patients' consent will be collected by the study obstetrician or diabetologist at an appointment or at an outpatient visit, before initiation of treatment. Parents who do not object to the collection of data on their child will be informed thereof beforehand.

# 10 REFERENCES

1. Cheung, N.W. and K. Byth, *Population health significance of gestational diabetes*. Diabetes Care, 2003. **26**(7): p. 2005-9.
2. Vendittelli, F., et al., [Audipog perinatal network. Part 1: principal perinatal health indicators, 2004-2005]. Gynecol Obstet Fertil, 2008. **36**(11): p. 1091-100.
3. Metzger, B.E., et al., *Hyperglycemia and adverse pregnancy outcomes*. N Engl J Med, 2008. **358**(19): p. 1991-2002.
4. O'Sullivan, J.B. and C.M. Mahan, *Criteria for the Oral Glucose Tolerance Test in Pregnancy*. Diabetes, 1964. **13**: p. 278-85.
5. Carpenter, M.W. and D.R. Coustan, *Criteria for screening tests for gestational diabetes*. Am J Obstet Gynecol, 1982. **144**(7): p. 768-73.
6. WHO, Who 1999, definition, diagnosis and classification of diabetes mellitus and its complication. World Health Organization, 1999. **WHO/NCD/NCS/99.2**(Geneva.).
7. Metzger, B.E., et al., International association of diabetes and pregnancy study groups recommendations on the diagnosis and classification of hyperglycemia in pregnancy. Diabetes Care, 2010. **33**(3): p. 676-82.
8. Crowther, C.A., et al., Effect of treatment of gestational diabetes mellitus on pregnancy outcomes. N Engl J Med, 2005. **352**(24): p. 2477-86.
9. Horvath, K., et al., Effects of treatment in women with gestational diabetes mellitus: systematic review and meta-analysis. Bmj, 2010. **340**: p. c1395.
10. Alwan, N., D.J. Tuffnell, and J. West, *Treatments for gestational diabetes*. Cochrane Database Syst Rev, 2009(3): p. CD003395.
11. Bonomo, M., et al., Evaluating the therapeutic approach in pregnancies complicated by borderline glucose intolerance: a randomized clinical trial. Diabet Med, 2005. **22**(11): p. 1536-41.
12. Landon, M.B., et al., A multicenter, randomized trial of treatment for mild gestational diabetes. N Engl J Med, 2009. **361**(14): p. 1339-48.
13. Bancroft, K., et al., A randomised controlled pilot study of the management of gestational impaired glucose tolerance. Bjog, 2000. **107**(8): p. 959-63.
14. Langer, O., et al., *Gestational diabetes: the consequences of not treating*. Am J Obstet Gynecol, 2005. **192**(4): p. 989-97.



- 1081 15. Rowan, J.A., et al., Metformin versus insulin for the treatment of gestational diabetes. *N Engl J Med*,  
1082 2008. **358**(19): p. 2003-15.
- 1083 16. Niemi, M., et al., Effects of rifampin on the pharmacokinetics and pharmacodynamics of glyburide and  
1084 glipizide. *Clin Pharmacol Ther*, 2001. **69**(6): p. 400-6.
- 1085 17. Groop, L., et al., Different effects of glyburide and glipizide on insulin secretion and hepatic glucose  
1086 production in normal and NIDDM subjects. *Diabetes*, 1987. **36**(11): p. 1320-8.
- 1087 18. Groop, L.C., et al., Dose-dependent effects of glyburide on insulin secretion and glucose uptake in  
1088 humans. *Diabetes Care*, 1991. **14**(8): p. 724-7.
- 1089 19. Elliott, B.D., et al., *Insignificant transfer of glyburide occurs across the human placenta*. *Am J Obstet*  
1090 *Gynecol*, 1991. **165**(4 Pt 1): p. 807-12.
- 1091 20. Elliott, B.D., et al., Comparative placental transport of oral hypoglycemic agents in humans: a model of  
1092 human placental drug transfer. *Am J Obstet Gynecol*, 1994. **171**(3): p. 653-60.
- 1093 21. Langer, O., et al., A comparison of glyburide and insulin in women with gestational diabetes mellitus. *N*  
1094 *Engl J Med*, 2000. **343**(16): p. 1134-8.
- 1095 22. Kimber-Trojnar, Z., et al., *Glyburide for the treatment of gestational diabetes mellitus*. *Pharmacol Rep*,  
1096 2008. **60**(3): p. 308-18.
- 1097 23. Hebert, M.F., et al., Are we optimizing gestational diabetes treatment with glyburide? The pharmacologic  
1098 basis for better clinical practice. *Clin Pharmacol Ther*, 2009. **85**(6): p. 607-14.
- 1099 24. Fines, V., T. Moore, and S. Castle, *A comparison of glyburide and insulin treatment in gestational*  
1100 *diabetes mellitus on infant birth weight and adiposity*. *American Journal of Obstetrics and Gynecology*, 2003.  
1101 **189**(6, Supplement 1): p. S108-S108.
- 1102 25. Gilson, G. and N. Murphy, Comparison of oral glyburide with insulin for the management of gestational  
1103 diabetes mellitus in Alaska Native women. *American Journal of Obstetrics and Gynecology*, 2003. **187**(6): p.  
1104 S152.
- 1105 26. Yogev, Y., et al., Undiagnosed asymptomatic hypoglycemia: diet, insulin, and glyburide for gestational  
1106 diabetic pregnancy. *Obstet Gynecol*, 2004. **104**(1): p. 88-93.
- 1107 27. Chmait, R., T. Dinise, and T. Moore, Prospective observational study to establish predictors of glyburide  
1108 success in women with gestational diabetes mellitus. *J Perinatol*, 2004. **24**(10): p. 617-22.
- 1109 28. Conway, D.L., O. Gonzales, and D. Skiver, *Use of glyburide for the treatment of gestational diabetes: the*  
1110 *San Antonio experience*. *J Matern Fetal Neonatal Med*, 2004. **15**(1): p. 51-5.
- 1111 29. Jacobson, G.F., et al., Comparison of glyburide and insulin for the management of gestational diabetes in  
1112 a large managed care organization. *Am J Obstet Gynecol*, 2005. **193**(1): p. 118-24.
- 1113 30. Rochon, M., et al., Glyburide for the management of gestational diabetes: risk factors predictive of failure  
1114 and associated pregnancy outcomes. *Am J Obstet Gynecol*, 2006. **195**(4): p. 1090-4.
- 1115 31. Ramos, G.A., et al., Comparison of glyburide and insulin for the management of gestational diabetics with  
1116 markedly elevated oral glucose challenge test and fasting hyperglycemia. *J Perinatol*, 2007. **27**(5): p. 262-7.
- 1117 32. Moore, T.R., Glyburide for the treatment of gestational diabetes. A critical appraisal. *Diabetes Care*, 2007.  
1118 **30 Suppl 2**: p. S209-13.
- 1119 33. Moretti, M.E., M. Rezvani, and G. Koren, *Safety of glyburide for gestational diabetes: a meta-analysis of*  
1120 *pregnancy outcomes*. *Ann Pharmacother*, 2008. **42**(4): p. 483-90.
- 1121 34. Nicholson, W., et al., Benefits and risks of oral diabetes agents compared with insulin in women with  
1122 gestational diabetes: a systematic review. *Obstet Gynecol*, 2009. **113**(1): p. 193-205.
- 1123 35. Anjalakshi, C., et al., A prospective study comparing insulin and glibenclamide in gestational diabetes  
1124 mellitus in Asian Indian women. *Diabetes Res Clin Pract*, 2007. **76**(3): p. 474-5.
- 1125 36. Bertini, A.M., et al., *Perinatal outcomes and the use of oral hypoglycemic agents*. *J Perinat Med*, 2005.  
1126 **33**(6): p. 519-23.
- 1127 37. Ogunyemi, D., M. Jesse, and M. Davidson, Comparison of glyburide versus insulin in management of  
1128 gestational diabetes mellitus. *Endocr Pract*, 2007. **13**(4): p. 427-8.
- 1129 38. Silva, J.C., et al., [Glibenclamide in the treatment for gestational diabetes mellitus in a compared study to  
1130 insulin]. *Arq Bras Endocrinol Metabol*, 2007. **51**(4): p. 541-6.
- 1131 39. Coetzee, E.J. and W.P. Jackson, *The management of non-insulin-dependent diabetes during pregnancy*.  
1132 *Diabetes Res Clin Pract*, 1985. **1**(5): p. 281-7.
- 1133 40. Velazquez, M.D., J. Bolnick, and D. Cloakey, *The use of glyburide in the management of gestational*  
1134 *diabetes*. *Obstetrics & Gynecology*, 2003. **101**: p. S88.
- 1135 41. Dhulkotia, J.S., et al., Oral hypoglycemic agents vs insulin in management of gestational diabetes: a  
1136 systematic review and metaanalysis. *Am J Obstet Gynecol*, 2010. **203**(5): p. 457 e1-9.

- 1137 42. Mamelle, N., F. Munoz, and H. Grandjean, [*Fetal growth from the AUDIPOG study. I. Establishment of*  
1138 *reference curves*]. J Gynecol Obstet Biol Reprod (Paris), 1996. **25**(1): p. 61-70.
- 1139 43. Brustman, L., et al., Hypoglycemia in glyburide-treated gestational diabetes: is it dose-dependent? Obstet  
1140 Gynecol, 2011. **117**(2 Pt 1): p. 349-53.
- 1141 44. Elie, C., et al., [Methodological and statistical aspects of equivalence and non inferiority trials]. Rev  
1142 Epidemiol Sante Publique, 2008. **56**(4): p. 267-77.
- 1143 45. Altman, D.G., et al., The revised CONSORT statement for reporting randomized trials: explanation and  
1144 elaboration. Ann Intern Med, 2001. **134**(8): p. 663-94.
- 1145 46. Piaggio, G., et al., Reporting of noninferiority and equivalence randomized trials: an extension of the  
1146 CONSORT statement. JAMA, 2006. **295**(10): p. 1152-60.
- 1147 47. Niemi, M., et al., Glyburide and glimepiride pharmacokinetics in subjects with different CYP2C9  
1148 genotypes. Clin Pharmacol Ther, 2002. **72**(3): p. 326-32.
- 1149 48. Carbonell, N., et al., CYP2C9\*3 Loss-of-Function Allele Is Associated With Acute Upper Gastrointestinal  
1150 Bleeding Related to the Use of NSAIDs Other Than Aspirin. Clin Pharmacol Ther, 2010. **87**(6): p. 693-8.
- 1151 49. Kim, C., K.M. Newton, and R.H. Knopp, *Gestational diabetes and the incidence of type 2 diabetes: a*  
1152 *systematic review*. Diabetes Care, 2002. **25**(10): p. 1862-8.
- 1153 50. Heude, B., et al., Pre-Pregnancy Body Mass Index and Weight Gain During Pregnancy: Relations with  
1154 Gestational Diabetes and Hypertension, and Birth Outcomes. Matern Child Health J, 2011.
- 1155 51. Simeoni, U. and D.J. Barker, *Offspring of diabetic pregnancy: long-term outcomes*. Semin Fetal Neonatal  
1156 Med, 2009. **14**(2): p. 119-24.
- 1157
- 1158
- 1159

## 11 LIST OF STUDY CENTERS

| Center name and address                                                                                                           | Gynecologists                                                                                                                                                      | Diabetologists                                                                                                                                 |
|-----------------------------------------------------------------------------------------------------------------------------------|--------------------------------------------------------------------------------------------------------------------------------------------------------------------|------------------------------------------------------------------------------------------------------------------------------------------------|
| Service de Gynécologie Obstétrique<br>Hôpital du Kremlin Bicêtre<br>78, rue du Général Leclerc<br>94275 LE KREMLIN BICETRE Cedex  | Prof Marie Victoire Senat<br>Tel: 01 45 21 75 56<br>marie-victoire.senat@bct.aphp.fr                                                                               | Prof Philippe Chanson<br>Tel: 01 45 21 37 05<br>philippe.chanson@bct.aphp.fr                                                                   |
| Service de Gynécologie Obstétrique<br>Hôpital Saint Antoine<br>184, rue du Faubourg St Antoine -75012 PARIS                       | Prof Bruno Carbonne<br>Tel: 01 49 28 27 45<br>bruno.carbonne@sat.aphp.fr<br><br>Prof Jean Marie Jouannic<br>Tel: 01 44 73 52 28<br>jean-marie.jouannic@trs.aphp.fr | Dr Sophie Christin Maitre<br>sophie.christin-maitre@sat.aphp.fr                                                                                |
| Service de Gynécologie Obstétrique<br>Hôpital Bichat<br>46, rue Henri Huchard - 75877 PARIS Cedex 18                              | Dr Elie Azria<br>Tel: 01 40 25 76 69<br>elie.azria@bch.aphp.fr                                                                                                     | Prof Michel Marre<br>michel.marre@bch.aphp.fr                                                                                                  |
| Service de Gynécologie Obstétrique<br>Hôpital Antoine Béclère<br>157, rue de la Porte de Trivaux - 9<br>2140 CLAMART              | Dr Anne Gael Cordier<br>Tel: 01 45 37 47 70<br>anne.gael.cordier@abc.aphp.fr                                                                                       | Docteur Catherine Rolland<br>catherine.rolland@abc.aphp.fr                                                                                     |
| Service de Gynécologie Obstétrique<br>Centre Intercommunal de Poissy<br>10, rue du Champ Gaillard - 78300 POISSY                  | Prof Patrick Rozenberg<br>Tel: 01 39 27 52 57<br>prozenberg@chi-poissy-st-germain.fr                                                                               | Dr Marie-Laure Anciaux<br>mlanciaux@chi-psg.com                                                                                                |
| Service de Gynécologie Obstétrique Néonatalogie<br>Hôpital Jeanne de Flandres<br>2, avenue Oscar Lambret - 59000 LILLE            | Prof Philippe Deruelle<br>Tel: 03 20 44 59 62<br>philippe.deruelle@univ-lille2.fr                                                                                  | Dr Anne Vambergue<br><a href="mailto:anne.vambergue@chru-lille.fr">anne.vambergue@chru-lille.fr</a>                                            |
| Service de Gynécologie Obstétrique<br>Hôpital Robert Debré<br>48, bd Sérurier - 75935 PARIS Cedex 19                              | Prof Olivier Sibony<br>Tel: 01 58 41 21 42<br>olivier.sibony@rdb.aphp.fr<br>Dr Thomas Schmitz<br>Tel: 01 58 41 21 42<br>thomas.schmitz@rdb.aphp.fr                 | Prof Patrick Vexiau<br>patrick.vexiau@sls.aphp.fr                                                                                              |
| Service de Gynécologie Obstétrique<br>Hôpital de Toulouse<br>49, allée Charles Defitte - 31076 TOULOUSE Cedex 3                   | Prof Christophe Vayssiere<br>Tel: 05 67 77 92 67<br>vayssiere.c@chu-toulouse.fr                                                                                    | Dr F. Lorenzini<br>lorenzini.f@chu-toulouse.fr                                                                                                 |
| Service de Gynécologie Obstétrique<br>Hôpital d'Angers<br>2, rue Moll - 49100 ANGERS                                              | Prof Loic Senthiles<br>Tel: 02 41 35 77 44<br>loic.senthiles@hotmail.com                                                                                           | Dr Soares Barbosa<br><a href="mailto:sasoares@chu-angers.fr">sasoares@chu-angers.fr</a>                                                        |
| Service de Gynécologie Obstétrique<br>Hôpital de Tours<br>4, rue Jules Mourgeault - 37000 TOURS                                   | Dr Emmanuel Simon<br>Tel: 02 47 47 47 36<br>e.simon@chu-tours.fr                                                                                                   | Prof François Maillot<br><a href="mailto:maillot@med.univ-tours.fr">maillot@med.univ-tours.fr</a>                                              |
| Service de Gynécologie Obstétrique<br>Hôpital de Marseille - Hôpital Nord<br>Chemin des Bourrelly - 13915 MARSEILLE               | Prof Florence Bretelle<br>Tel: 04 91 96 46 72<br>florence.bretelle@ap-hm.fr                                                                                        | Dr Catherine Atlan<br>Catherine.ATLAN@mail.ap-hm.fr                                                                                            |
| Service de Gynécologie Obstétrique<br>Hôpital Beaujon<br>100, bld du Général Leclerc - 92110 CLICHY                               | Dr Pierre François Ceccaldi<br>Tel: 01 40 87 79 14<br><a href="mailto:pfceccaldi@gmail.com">pfceccaldi@gmail.com</a>                                               | Azédine Tabbi<br><a href="mailto:azedine.tabbi@lrb.aphp.fr">azedine.tabbi@lrb.aphp.fr</a><br><br>Prof Michel Marre<br>michel.marre@bch.aphp.fr |
| Service de Gynécologie Obstétrique<br>Hôpital de Caen<br>Avenue de la Côte de Nacre - 14033 CAEN Cedex 09                         | Dr Gael Beucher<br>Tel: 02 31 27 23 36<br>beucher-g@chu-caen.fr                                                                                                    | Yves Reznik<br>reznik-sec-consult@chu-caen.fr                                                                                                  |
| Service de Gynécologie Obstétrique du Pr. Mandelbrot<br>Hôpital Louis Mourier<br>178 rue des Renouilliers<br>92701 COLOMBES Cedex | Prof Laurent Mandelbrot<br>Tel: 01 47 60 63 39<br><a href="mailto:laurent.mandelbrot@lmr.aphp.fr">laurent.mandelbrot@lmr.aphp.fr</a><br>Dr Guillaume Girard        | Dr Guillaume Girard<br>guillaume.girard@lmr.aphp.fr                                                                                            |
| Service de Diabétologie<br>Hôpital Saint-Louis<br>1, Avenue Claude-Vellefaux - 75010Paris                                         | Prof Patrick Vexiau<br>Tel:<br>patrick.vexiau@sls.aphp.fr                                                                                                          | Prof Patrick Vexiau<br>Tel:<br>patrick.vexiau@sls.aphp.fr                                                                                      |

## 12 ALGORITHM FOR ADAPTATION OF DAONIL® DOSES GIVEN TO THE PATIENT AT APPOINTMENTS

### PRESCRIPTION AND ADAPTATION OF DAONIL

#### DIABETIC PREGNANT WOMAN

Capillary blood glucose measurements in the fasting state and 2 h after each meal

OBJECTIVE: Blood glucose: in fasting state: below 0.95 g/L

2 hours after each meal: below 1.20 g/L

Starting treatment with Daonil® 5 mg: ½ tablet/day

Doses will then be adjusted every 4 days for 21 days:

- on the 4<sup>th</sup> day by you, and on the 8<sup>th</sup> day by the diabetologist,

- on 12<sup>th</sup> and 16<sup>th</sup> days by you, and on the 21<sup>st</sup> day by the diabetologist.

- If in the 4 days following treatment initiation 2 or more blood glucose readings are above target values (>0.95 g/L fasting blood glucose or >1.20 g/L 2 hours after a meal), on the 5<sup>th</sup> day, ie, on ....., increase Daonil® to 1 tablet/day, ie, 5 mg.

Diabetology appointment scheduled for 8 days after the start of treatment, ie, on:.....

New prescription: Daonil® 5 mg: Morning:.....tablets Evening:.....tablets

- If in the 4 days following treatment adjustment by the diabetologist 2 or more blood glucose readings are above target values (>0.95 g/L fasting blood glucose or plus de 1.20 g/L 2 hours after a meal), the next day, ie, on:....., increase Daonil® to:

1 tablet/day if the previous dose was ½ tablet/day

**2 tablets/day** (1 tablet in the morning and 1 tablet in the evening) if **the previous dose was 1 tablet/day**

**3 tablets/day** (2 tablets in the morning and 1 tablet in the evening) if **the previous dose was 2 tablets/day**

- If in the next 4 days 2 or more blood glucose readings are above target values (>0.95 g/L fasting blood glucose or >1.20 g/L 2 hours after a meal), the next day, ie, on:....., increase Daonil® to:

1 tablet/day if the previous dose was ½ tablet/day

**2 tablets/day** (1 tablet in the morning and 1 tablet in the evening) if **the previous dose was 1 tablet/day**

**3 tablets/day** (2 tablets in the morning and 1 tablet in the evening) if **the previous dose was 2 tablets/day**

4 tablets/day (2 tablets in the morning and in the evening) if the previous dose was 3 tablets/day

- If there is a deviation from the usual diet, do not take into account the blood glucose value following the meal in question.

- In cases of hypoglycemia (<0.70 g/L with malaise, or <0.60 g/L), decrease Daonil® to the previous dose the next day.

Diabetology appointment scheduled in 21 days, ie, on:.....

Name of prescriber: ..... Signature and stamp:

## 13 SATISFACTION QUESTIONNAIRE

Glyburide versus insulin in the treatment of gestational diabetes after failure of dietary management: INDAO trial

### SATISFACTION QUESTIONNAIRE

Patient's identification code      \_ \_ - \_ \_ \_ \_ - \_ \_ \_

Date questionnaire completed      \_ \_ - \_ \_ - \_ \_ \_ \_ \_  
DD-MM-YYYY

Madam,

You have just taken part in a research study designed to show that treatment with Daonil® is not less effective than insulin in terms of maternal and fetal complications in the treatment of gestational diabetes resistant to dietary management alone. We would like to know what you think about this treatment.

For each question, please tick the appropriate box.

#### A. EASE OF TREATMENT

1) How many times did you forget your treatment?

- Never
- <1 time a week
- 1 to 3 times a week
- 4 to 6 times a week
- >6 times a week

2) Which treatment would you take for a new pregnancy?

- Insulin (subcutaneous injection)
- Daonil® (oral tablets)
- I'm not bothered

3) What was the simplest part of the treatment?

- Blood glucose monitoring (capillary blood glucose)
- Dietary monitoring
- Taking the treatment

4) What was the hardest part of the treatment?

- Blood glucose monitoring (capillary blood glucose)
- Dietary monitoring
- Taking the treatment

#### B. ADVERSE REACTIONS TO TREATMENT

1) Did you experience symptoms of hypoglycemia (malaise, feeling of weakness) during your treatment?

- No
- Yes

2) Overall, how severe were the unpleasant symptoms caused by the treatment that you experienced?

Tick the box that best describes your experience

(0=No symptoms.... 10=Extremely unpleasant symptoms)

(The more unpleasant the symptoms, the higher the score)

1261 □-□-□-□-□-□-□-□-□-□  
1262 0 1 2 3 4 5 6 7 8 9 10

1263  
1264  
1265 C. OVERALL SATISFACTION

1266 Overall, are you satisfied with your treatment?

1268  Not at all

1269  Fairly

1270  Moderately

1271  Very

1272  Extremely

1273  
1274  
1275  
1276 D. TO BE COMPLETED ONLY BY PATIENTS WHO RECEIVED DAONIL® AND THEN INSULIN

1277  
1278 1) For a subsequent pregnancy, would you wish to receive:

1279  Daonil® and then, if necessary, insulin again

1280  Insulin straight away

1281  
1282 2) Does the change of treatment worry you?

1283  No

1284  Yes

1285

**14 REPORTING NONINFERIORITY AND EQUIVALENCE (CONSORT)**

From JAMA, 2006

## REPORTING NONINFERIORITY AND EQUIVALENCE

**Table.** Checklist of Items for Reporting Noninferiority or Equivalence Trials (Additions or Modifications to the CONSORT Checklist are Shown in Italics)

| Paper Section and Topic              | Item Number | Descriptor (Adapted for Noninferiority or Equivalence Trials)                                                                                                                                                                                                                                                                                                                            |
|--------------------------------------|-------------|------------------------------------------------------------------------------------------------------------------------------------------------------------------------------------------------------------------------------------------------------------------------------------------------------------------------------------------------------------------------------------------|
| Title and abstract                   | 1*          | How participants were allocated to interventions (eg, "random allocation," "randomized," or "randomly assigned"), <i>specifying that the trial is a noninferiority or equivalence trial.</i>                                                                                                                                                                                             |
| Introduction<br>Background           | 2*          | Scientific background and explanation of rationale, <i>including the rationale for using a noninferiority or equivalence design.</i>                                                                                                                                                                                                                                                     |
| Methods<br>Participants              | 3*          | Eligibility criteria for participants ( <i>detailing whether participants in the noninferiority or equivalence trial are similar to those in any trial[s] that established efficacy of the reference treatment</i> ) and the settings and locations where the data were collected.                                                                                                       |
| Interventions                        | 4*          | Precise details of the interventions intended for each group, <i>detailing whether the reference treatment in the noninferiority or equivalence trial is identical (or very similar) to that in any trial(s) that established efficacy</i> , and how and when they were actually administered.                                                                                           |
| Objectives                           | 5*          | Specific objectives and hypotheses, <i>including the hypothesis concerning noninferiority or equivalence.</i>                                                                                                                                                                                                                                                                            |
| Outcomes                             | 6*          | Clearly defined primary and secondary outcome measures, <i>detailing whether the outcomes in the noninferiority or equivalence trial are identical (or very similar) to those in any trial(s) that established efficacy of the reference treatment</i> and, when applicable, any methods used to enhance the quality of measurements (eg, multiple observations, training of assessors). |
| Sample size                          | 7*          | How sample size was determined, <i>detailing whether it was calculated using a noninferiority or equivalence criterion and specifying the margin of equivalence with the rationale for its choice.</i> When applicable, explanation of any interim analyses and stopping rules ( <i>and whether related to a noninferiority or equivalence hypothesis</i> ).                             |
| Randomization<br>Sequence generation | 8           | Method used to generate the random allocation sequence, including details of any restriction (eg, blocking, stratification).                                                                                                                                                                                                                                                             |
| Allocation concealment               | 9           | Method used to implement the random allocation sequence (eg, numbered containers or central telephone), clarifying whether the sequence was concealed until interventions were assigned.                                                                                                                                                                                                 |
| Implementation                       | 10          | Who generated the allocation sequence, who enrolled participants, and who assigned participants to their groups.                                                                                                                                                                                                                                                                         |
| Blinding (masking)                   | 11          | Whether or not participants, those administering the interventions, and those assessing the outcomes were blinded to group assignment. When relevant, how the success of blinding was evaluated.                                                                                                                                                                                         |
| Statistical methods                  | 12*         | Statistical methods used to compare groups for primary outcome(s), <i>specifying whether a 1- or 2-sided confidence interval approach was used.</i> Methods for additional analyses, such as subgroup analyses and adjusted analyses.                                                                                                                                                    |
| Results<br>Participant flow          | 13          | Flow of participants through each stage (a diagram is strongly recommended). Specifically, for each group report the numbers of participants randomly assigned, receiving intended treatment, completing the trial protocol, and analyzed for the primary outcome. Describe protocol deviations from trial as planned, together with reasons.                                            |
| Recruitment                          | 14          | Dates defining the periods of recruitment and follow-up.                                                                                                                                                                                                                                                                                                                                 |
| Baseline data                        | 15          | Baseline demographic and clinical characteristics of each group.                                                                                                                                                                                                                                                                                                                         |
| Numbers analyzed                     | 16*         | Number of participants (denominator) in each group included in each analysis and whether <i>"intention-to-treat" and/or alternative analyses were conducted.</i> State the results in absolute numbers when feasible (eg, 10/20, not 50%).                                                                                                                                               |
| Outcomes and estimation              | 17*         | For each primary and secondary outcome, a summary of results for each group and the estimated effect size and its precision (eg, 95% confidence interval). <i>For the outcome(s) for which noninferiority or equivalence is hypothesized, a figure showing confidence intervals and margins of equivalence may be useful.</i>                                                            |
| Ancillary analyses                   | 18          | Address multiplicity by reporting any other analyses performed, including subgroup analyses and adjusted analyses, indicating those prespecified and those exploratory.                                                                                                                                                                                                                  |
| Adverse events                       | 19          | All important adverse events or side effects in each intervention group.                                                                                                                                                                                                                                                                                                                 |
| Comment<br>Interpretation            | 20*         | Interpretation of the results, taking into account the <i>noninferiority or equivalence hypothesis and any other trial hypotheses</i> , sources of potential bias or imprecision and the dangers associated with multiplicity of analyses and outcomes.                                                                                                                                  |
| Generalizability                     | 21          | Generalizability (external validity) of the trial findings.                                                                                                                                                                                                                                                                                                                              |
| Overall evidence                     | 22          | General interpretation of the results in the context of current evidence.                                                                                                                                                                                                                                                                                                                |

\*Expansion of corresponding item on CONSORT checklist.<sup>2,3</sup>

1289  
1290  
1291  
1292  
1293  
1294

## 15 CLASSIFICATION OF SERIOUS ADVERSE EVENTS

Classification of adverse events in biomedical research on a drug or related product  
 Classification of serious adverse events in biomedical research (Art. R. 1123-54 of the Public Health Code)  
 Comparison of Insulin and DAOnil in the treatment of gestational diabetes  
 Randomized, controlled, multicenter, noninferiority trial (INDAO) - P110104

|                                                                                                                                                                                                                                                                                                                                                                                                                                                                                                                                                                                                                                                                                                                                                                                                                                                                                                                                                                                                                                                                                                                        |                                                                                                                                                                                                                                                                                                                                                                                                                                                                                                                                                                                                                                                                                                                                                                                                                                                                                                                                                                                                                                                                                                                                                                                                                                                                                                                                                                                                                  |                                                                                                                                                                                                                                                                                                                                                                                                                                                                                                                                                                                                                                                                                                                                                                                                                                                                                                                                                                                 |                                                                                                                                                                                                                                                                                                                                                                                                                                                                                                                                                                                                  |
|------------------------------------------------------------------------------------------------------------------------------------------------------------------------------------------------------------------------------------------------------------------------------------------------------------------------------------------------------------------------------------------------------------------------------------------------------------------------------------------------------------------------------------------------------------------------------------------------------------------------------------------------------------------------------------------------------------------------------------------------------------------------------------------------------------------------------------------------------------------------------------------------------------------------------------------------------------------------------------------------------------------------------------------------------------------------------------------------------------------------|------------------------------------------------------------------------------------------------------------------------------------------------------------------------------------------------------------------------------------------------------------------------------------------------------------------------------------------------------------------------------------------------------------------------------------------------------------------------------------------------------------------------------------------------------------------------------------------------------------------------------------------------------------------------------------------------------------------------------------------------------------------------------------------------------------------------------------------------------------------------------------------------------------------------------------------------------------------------------------------------------------------------------------------------------------------------------------------------------------------------------------------------------------------------------------------------------------------------------------------------------------------------------------------------------------------------------------------------------------------------------------------------------------------|---------------------------------------------------------------------------------------------------------------------------------------------------------------------------------------------------------------------------------------------------------------------------------------------------------------------------------------------------------------------------------------------------------------------------------------------------------------------------------------------------------------------------------------------------------------------------------------------------------------------------------------------------------------------------------------------------------------------------------------------------------------------------------------------------------------------------------------------------------------------------------------------------------------------------------------------------------------------------------|--------------------------------------------------------------------------------------------------------------------------------------------------------------------------------------------------------------------------------------------------------------------------------------------------------------------------------------------------------------------------------------------------------------------------------------------------------------------------------------------------------------------------------------------------------------------------------------------------|
| DO NOT NOTIFY THE SPONSOR BY FAX (do not complete the serious adverse events form), <u>but</u> note on the adverse events pages of the CRF                                                                                                                                                                                                                                                                                                                                                                                                                                                                                                                                                                                                                                                                                                                                                                                                                                                                                                                                                                             |                                                                                                                                                                                                                                                                                                                                                                                                                                                                                                                                                                                                                                                                                                                                                                                                                                                                                                                                                                                                                                                                                                                                                                                                                                                                                                                                                                                                                  | The investigator SHOULD NOTIFY the sponsor WITHOUT DELAY (by faxing the serious adverse events form to 01 44 84 17 99) and enter the information on the adverse events pages of the CRF                                                                                                                                                                                                                                                                                                                                                                                                                                                                                                                                                                                                                                                                                                                                                                                         |                                                                                                                                                                                                                                                                                                                                                                                                                                                                                                                                                                                                  |
| Other events                                                                                                                                                                                                                                                                                                                                                                                                                                                                                                                                                                                                                                                                                                                                                                                                                                                                                                                                                                                                                                                                                                           | Expected non-serious adverse events<br>Known to be related to:<br>an experimental drug of the research                                                                                                                                                                                                                                                                                                                                                                                                                                                                                                                                                                                                                                                                                                                                                                                                                                                                                                                                                                                                                                                                                                                                                                                                                                                                                                           | Expected serious adverse events<br>known to be related to the experimental drug                                                                                                                                                                                                                                                                                                                                                                                                                                                                                                                                                                                                                                                                                                                                                                                                                                                                                                 | Unexpected serious adverse events                                                                                                                                                                                                                                                                                                                                                                                                                                                                                                                                                                |
| <p>EVENTS THAT MAY BE SERIOUS but are not associated with the experimental drugs or the research procedures:<br/>         Description:<br/>         Everything that is in accord with the natural progression of the disease</p> <p>-Pregnancy-related complications:<br/>         -Scheduled hospitalizations for examinations in the framework of usual follow-up</p> <p>Usually observed during pregnancy:<br/>         nausea, esophagitis due to reflux or vomiting, anemia, bacteriuria, nephritic colitis, cramp, cystitis, cytomegalovirus, lower back pain, pelvic pain, perineal pain, maternal fever, viral hepatitis, genital herpes, herpes during pregnancy, polyhydramnios, sexually transmitted infection, ovarian cyst, listeriosis, acute lymphangitis, mycoplasma, aseptic necrobiosis, parodontitis, parvovirus, postterm pregnancy, cesarean section, cervical tear, perineal tear, instrumental delivery, forceps, metrorrhagia</p> <p>- Fetal complications:<br/>         macrosomia, shoulder dystocia, neonatal hyperbilirubinemia, fracture of the upper limb, brachial plexus paralysis</p> | <p>Description: <b>DAONIL 5 mg</b><br/>         Mother<br/>         - Metabolic and nutritional disorders:<br/>         *According to CTCAE V4 0 criteria<br/>         - Hypoglycemia: &lt;3<br/>         - <b>Mucocutaneous eruptions:</b><br/>         pruritus, urticaria, maculopapular. &lt;3<br/>         - <b>Some</b> cases of photosensitization have been reported<br/>         - <b>Immune system disorders:</b><br/>         •Signs of hypersensitivity such as bronchospasm &lt;3<br/>         - <b>Gastrointestinal disorders:</b><br/>         •Nausea, diarrhea, epigastric pain. &lt;3<br/>         - <b>Hepatobiliary disorders:</b><br/>         •Increased liver enzymes &lt;3<br/>         - <b>Blood disorders</b> generally reversible on treatment discontinuation<br/>         - <b>Hyper eosinophilia</b>, leukopenia, thrombocytopenia &lt;3<br/>         - <b>Hyponatremia</b> (isolated cases).<br/>         - Occasional moderate increases in blood urea and creatinine &lt;3<br/>         - <b>Eye disorders:</b> Transient visual disturbances such as blurred vision or visual accommodation disturbances, especially at the start of treatment, with or without blood glucose variation &lt;3<br/>         - <b>General disorders:</b><br/>         Antabuse effect when alcohol ingested with meals &lt;3<br/>         Newborn:<br/>         Hypoglycemia &lt;3 moderate</p> | <p>Description: <b>DAONIL 5 mg</b><br/>         Mother<br/>         * According to CTCAE V4 0 criteria<br/>         - Hypoglycemia ≥3<br/>         - Hypotension or even shock ≥3<br/>         - <b>Hepatobiliary disorders:</b><br/>         •cytolytic or cholestatic hepatitis requiring discontinuation of treatment. These can progress to life-threatening liver failure ≥3<br/>         - <b>Hyper eosinophilia:</b><br/>         leukopenia, thrombocytopenia ≥3<br/>         - Thrombocytopenia ≥3<br/>         -- <b>More rarely:</b><br/>         agranulocytosis, hemolytic anemia, medullary aplasia, and pancytopenia ≥3<br/>         -- <b>Exceptionally</b>, allergic, cutaneous, or visceral vasculitis that can be life-threatening ≥3<br/>         Other:<br/>         Unbalanced diabetes in the mother (hospitalization)<br/>         .<br/>         Newborn:<br/>         - Neonatal hypoglycemia ≥3<br/>         -Prenatal death<br/>         -Death</p> | <p>This column will be completed progressively as reported by the investigators</p> <p>Report all events meeting one of the criteria of severity* noted below, except for those identified in the other columns</p> <p>*Criteria of severity: in <u>mother / newborn</u><br/>         1- Death<br/>         2- Life-threatening<br/>         3- Requires inpatient hospitalization or prolongation of existing hospitalization<br/>         4- Lasting sequelae<br/>         5- Anomaly or congenital malformation<br/>         6- Event deemed serious by the investigator (specify reason)</p> |

1295  
1296  
1297
