# Supplementary material
Source: PubMed Central journal article supplement (PMC6583037)
Supplement: jama-319-1773-s002.pdf [file jama-319-1773-s002.pdf]

1 Statistical analysis plan for the INDAO randomized controlled trial

---

2 Scientific and analysis director: Jean Bouyer  
3 CESP Inserm U1018, Paris  
4 (Research Centre for Epidemiology and Population Health)  
5  
6

7  
8 **Document outline**  
9

10  
11 1. The Indao trial: Review of principal aspects ..... 2  
12 a. Objectives and design ..... 2  
13 b. Outcome ..... 2  
14 i. Primary outcome..... 2  
15 ii. Secondary outcomes..... 2  
16 2. Flow chart ..... 3  
17 3. Analysis ..... 3  
18 a. Descriptive analysis ..... 3  
19 b. Analysis of the primary outcome ..... 3  
20 c. Secondary outcomes ..... 3  
21 d. Satisfaction questionnaire ..... 3  
22 e. Management of missing data for the primary outcome ..... 3  
23  
24  
25  
26  
27

28

29 **1. The INDAO trial: Review of principal aspects**

30 a. Objectives and design

31 The INDAO trial is a randomized multicenter non-inferiority trial conducted between 2012 and 2016  
32 in France in 13 centers. Its principal objective is test whether oral glyburide is not inferior to  
33 subcutaneous insulin for prevention of perinatal complications in women with gestational diabetes  
34 mellitus (GDM).

35 The secondary objectives are to compare glyburide with insulin in terms of maternal blood sugar  
36 balance, rate of cesarean section, rate of premature delivery, perinatal mortality rate, rate of  
37 neonatal and maternal trauma associated with delivery, rate of respiratory distress, number of  
38 prenatal visits, number of days of hospitalization. Maternal satisfaction regarding the 2 drugs will be  
39 evaluated.

40 b. Outcome

41 i. Primary outcome

42 The primary outcome is a composite criterion of neonatal complications associated with gestational  
43 diabetes. Each component reflects the potential adverse effects of exposure to maternal  
44 hyperglycemia and hence of fetal hyperinsulinism. The components selected for this composite  
45 criterion are: fetal macrosomia (>4000g) or birth weight >90<sup>th</sup> percentile for gestational age; neonatal  
46 hypoglycemia ; neonatal hyperbilirubinemia

47 ii. Secondary outcomes

48 Maternal criteria:

- 49 • Maternal blood sugar balance evaluated using the average fasting blood glucose and  
50 postprandial blood glucose between diagnosis and delivery
- 51 • Number of episodes of maternal hypoglycemia defined by blood glucose <0.6 mg/dL and/or a  
52 clinical episode
- 53 • Rate of failure of glyburide (number of patients requiring insulin after maximum doses of  
54 glyburide)
- 55 • Rate of cesarean section
- 56 • Rate of premature delivery
- 57 • Rate of 3rd and 4th degree perineal tears
- 58 • Maternal satisfaction evaluated using a questionnaire (Appendix 18.2)

59 Neonatal criteria:

- 60 • Rate of neonatal trauma associated with delivery (shoulder dystocia, fracture, bone trauma,  
61 elongation of the brachial plexus)
- 62 • Rate of respiratory distress: need for respiratory support and/or oxygen therapy beyond 2  
63 hours of life
- 64 • Other neonatal criteria  
65 Birth weight index: Birth weight (g)/ Size cm<sup>3</sup> X100  
66 pH <7, lactate, base deficit >10, measured using cord blood  
67 Rate of neonatal mortality  
68 Rate of transfer to pediatrics or neonatal intensive care

69 Other criteria:

- 70 • Number of prenatal obstetric visits
- 71 • Number of diabetology appointments

- 72 • Number of days spent in hospital during pregnancy

## 73 **2. Flow chart**

74 Flow chart of the study will be drawn according to the Consort general recommendations.

## 75 **3. Analysis**

### 76 a. Descriptive analysis

77 The characteristics of the women at the time of randomization will be described separately for the  
78 two groups (glyburide and insulin) by providing mean and IQR for quantitative variables and number  
79 and percentages for qualitative variables.

80 No statistical test will be done to compare because of the randomization (a priori, the null hypothesis  
81 is always true). However, variables with a substantial difference between groups will be identified for  
82 further adjustment.

### 83 b. Analysis of the primary outcome

84 Primary outcome will be analyzed in providing the difference between the rates in the two groups  
85 and its 95% CI. Noninferiority will be demonstrated if the upper bound of the 95% CI is smaller than  
86 the pre-specified threshold of 7%.

87 Analyses and estimations will be adjusted for centers to take into account the multicenter nature of  
88 the trial.

89 The analysis of the primary outcome will be conducted on a "per protocol" (PP) basis as usual in non  
90 inferiority trials. Indeed, this analysis is the most conservative if there is a difference between the  
91 two treatments.

92 Women who were switched from glyburide to insulin during the trial will be excluded because they  
93 received a mix of both treatments. The compared groups will thus consist of two groups of women  
94 who follow the treatment that was initially assigned to them until delivery:

95 Complementary analyses will be done with the 3 components of the composite criterion with the  
96 same way to provide the results: 95%CI of the difference.

97 Additional sensitivity analyses will be done on an "intention to treat" (ITT) basis in which women  
98 remain in their initial group or by including women switched to the insulin group in a modified per  
99 protocol analysis.

100

### 101 c. Secondary outcomes

102 The secondary outcomes results will be considered as exploratory and as a way to comment or  
103 explain the results on the primary outcome.

104 The comparisons between groups will be adjusted for centers and made as superiority comparisons.

105 No corrections for multiple tests will be made.

### 106 d. Satisfaction questionnaire

107 The results of this questionnaire will be analyzed in the same way as the secondary outcome.

108

### 109 e. Management of missing data for the primary outcome

110 The protocol stipulates sensitivity analyses may be undertaken to evaluate the influence of missing  
111 data or lost to follow up.

112 Since there are very few lost to follow up and no missing data on primary outcome among women  
113 followed up, only complete-case method will be used.
