# Supplementary material
Source: PubMed Central journal article supplement (PMC6583037)
Supplement: jama-319-1773-s003.pdf [file jama-319-1773-s003.pdf]

## Supplementary Online Content

Sénat M-V, Affres H, Letourneau A, et al; Groupe de Recherche en Obstétrique et Gynécologie (GROG). Effect of glyburide vs subcutaneous insulin on perinatal complications among women with gestational diabetes: a randomized clinical trial. *JAMA*. doi:10.1001/jama.2018.4072

**eFigure.** Confidence Interval of the Difference of the Composite Criterion Rates and Noninferiority Margin

**eTable 1.** Primary and Secondary Intention-to-Treat Analysis

**eTable 2.** Post Hoc Intention-to-Treat Analyses

This supplementary material has been provided by the authors to give readers additional information about their work.

**eFigure.** Confidence Interval of the Difference of the Composite Criterion Rates and Noninferiority Margin

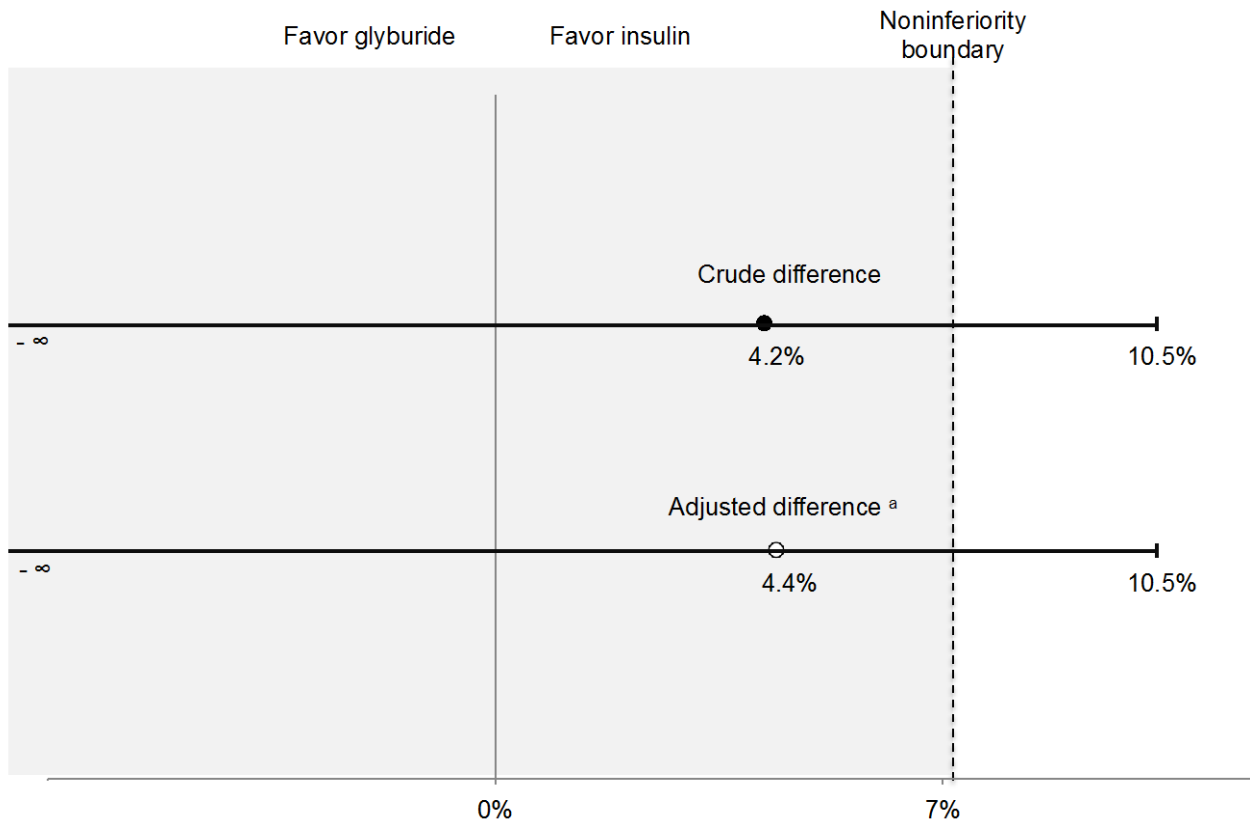

<sup>a</sup> adjustment for multiparity and gestational age at treatment

Differences are (glyburide rate) – (insulin rate)

Solid lines are the confidence intervals and their boundaries. Sample sizes are N=367 and N=442 in the Glyburide and in the insulin group respectively

Dashed line indicates noninferiority margin; grey-tinted region in the left of 7% indicates values for which glyburide would be considered noninferior to insulin.

The interpretation is therefore that this study fails to reject the null hypothesis that glyburide is non-inferior to insulin because the confidence intervals cross the a priori non-inferiority boundary of 7%.

**eTable 1. Primary and Secondary Intention-to-Treat Analysis**

|                                                                                                            | Glyburide<br>n = 448 | Insulin<br>n = 442 | Difference, % (95%<br>CI)     | P Value <sup>a</sup> |
|------------------------------------------------------------------------------------------------------------|----------------------|--------------------|-------------------------------|----------------------|
| <b>Primary outcome</b>                                                                                     |                      |                    |                               |                      |
| Neonatal composite criterion, No. (%)                                                                      | 123 (27.5)           | 103 (23.3)         | 4.2 (-∞ to 10.0) <sup>b</sup> | 0.17 <sup>c</sup>    |
| <b>Neonatal secondary outcomes</b>                                                                         |                      |                    |                               |                      |
| Admission to NICU <sup>d</sup> before 48 h of life, No. (%)                                                | 11 (2.2)             | 11 (2.4)           | 0.2 (-2.4 to 2.3)             | 0.96                 |
| Admission to neonatal ward <sup>e</sup> , No. (%)                                                          | 36 (7.9)             | 34 (8.2)           | -0.3 (-4.2 to 4.8)            | 0.87                 |
| Severe respiratory distress syndrome, No (%)                                                               | 9 (1.8)              | 11 (2.2)           | -0.4 (-2.7 to 1.8)            | 0.62                 |
| Birth injury, No. (%)                                                                                      | 7 (1.5)              | 9 (1.9)            | -0.5 (-2.4 to 1.3)            | 0.59                 |
| Shoulder dystocia, No                                                                                      | 1                    | 2                  |                               |                      |
| Bone fracture, No                                                                                          | 1                    | 6                  |                               |                      |
| Nerve palsy, No                                                                                            | 2                    | 0                  |                               |                      |
| Other <sup>f</sup> , No                                                                                    | 3                    | 1                  |                               |                      |
| Ponderal index <sup>g</sup> , mean (SD)                                                                    | 2.75 (0.04)          | 2.74 (0.04)        | 0.01 (-0.06 to 0.09)          | 0.43                 |
| pH < 7, No. (%)                                                                                            | 2 (0.5)              | 2 (0.5)            | 0.0 (-1.0 to 1.0)             | 0.98                 |
| Lactates, mmol/L <sup>h</sup> , No. (%)                                                                    |                      |                    |                               | 0.25                 |
| < 6                                                                                                        | 220 (81.8)           | 219 (82.3)         | -0.5 (-7.1 to 6.0)            |                      |
| [6 – 9[                                                                                                    | 36 (13.4)            | 41 (15.4)          | -2.0 (-8.0 to 3.9)            |                      |
| > 9                                                                                                        | 13 (4.8)             | 6 (2.3)            | 2.6 (-0.6 to 5.7)             |                      |
| <b>Maternal secondary outcomes</b>                                                                         |                      |                    |                               |                      |
| Glycemic control during pregnancy <sup>i</sup>                                                             |                      |                    |                               |                      |
| Fasting blood glucose > 0.95 g/L, No. (%)                                                                  |                      |                    |                               | 0.29                 |
| good: ≤ 20%                                                                                                | 283 (66.3)           | 264 (63.2)         | 3.1 (-3.3 to 9.6)             |                      |
| moderate or fair: [20% to 40%]                                                                             | 88 (20.6)            | 83 (19.9)          | -0.7 (-4.7 to 6.2)            |                      |
| poor: > 40%                                                                                                | 56 (13.1)            | 71 (17.0)          | -3.9 (-8.7 to 1.0)            |                      |
| Postprandial blood glucose >1.20 g/L, No. (%)                                                              |                      |                    |                               | 0.39                 |
| good: ≤ 20%                                                                                                | 217 (50.8)           | 206 (49.3)         | 1.5 (-5.2 to 8.3)             |                      |
| moderate or fair: [20% to 40%]                                                                             | 152 (35.6)           | 165 (39.5)         | -3.9 (-10.4 to 2.7)           |                      |
| poor: > 40%                                                                                                | 58 (13.6)            | 47 (11.2)          | 2.3 (-2.1 to 6.8)             |                      |
| Maternal hypoglycemia: at least one fasting or post prandial glycaemia < 0.6 g/L during pregnancy, No. (%) | 117 (30.1)           | 13 (3.6)           | 26.5 (17.6 to 35.3)           | <0.001               |
| Preterm delivery, No. (%)                                                                                  | 29 (6.2)             | 18 (4.0)           | 2.3 (-1.1 to 5.6)             | 0.12                 |
| Mode of delivery                                                                                           |                      |                    |                               | 0.26                 |
| Spontaneous Vaginal, No. (%)                                                                               | 255 (56.9)           | 251 (56.8)         | 0.1 (-6.4 to 6.6)             |                      |
| Assisted Vaginal, No. (%)                                                                                  | 73 (16.3)            | 67 (15.2)          | 1.1 (-3.7 to 5.9)             |                      |
| Elective Cesarean section, No. (%)                                                                         | 49 (10.9)            | 66 (14.9)          | -4.0 (-8.4 to 0.4)            |                      |
| Emergency Cesarean section, No. (%)                                                                        | 71 (15.9)            | 58 (13.1)          | 2.7 (-1.9 to 7.4)             |                      |
| Any perineal trauma, No. (%)                                                                               | 3 (0.7)              | 1 (0.2)            | 0.5 (-0.8 to 1.7)             | 0.35                 |
| Maternal satisfaction: Preferred treatment for a future pregnancy <sup>j</sup>                             |                      |                    |                               | <0.001               |
| Glyburide, No. (%)                                                                                         | 227 (72.3)           | 125 (43.6)         | 28.7 (21.2 to 36.3)           |                      |
| Insulin, No. (%)                                                                                           | 30 (9.6)             | 57 (19.9)          | -10.3 (-16.1 to -4.7)         |                      |
| Unknown, No. (%)                                                                                           | 57 (18.2)            | 105 (36.6)         | -18.4 (-25.5 to -11.4)        |                      |

<sup>a</sup> P value of the test of the coefficient of the mixed effects model used to account for multiple centers: logistic for qualitative variables, linear for quantitative ones

<sup>b</sup> Confidence interval for the primary outcome represents a 1-sided 97.5% CI

<sup>c</sup> P Value of the non-inferiority test

<sup>d</sup> Neonatal Intensive Care Unit

<sup>e</sup> Unit where the less sick newborns are hospitalized, the more severely ill are in the NICU

<sup>f</sup> glyburide group: facial hematoma, serosanguine hump, scalp wound ; insulin group: serosanguine hump

<sup>g</sup> Ponderal Index (100\*birth weight (g) / size (cm)<sup>3</sup>) may increase when quality maternal glycemic control decreases. The usual 10<sup>th</sup>, 50<sup>th</sup>, and 90<sup>th</sup> percentiles of ponderal index are 2.2, 2.6 and 3.1

<sup>h</sup> Lactate was known for 60% of newborns in both groups

<sup>i</sup> percentage of blood glucose concentrations greater than the thresholds: 0.95 g/L for fasting and 1.20 g/L for two hours postprandial. Missing data: 21 in the glyburide group, 24 in the insulin group

<sup>j</sup> n=605 (68.0%) responses

**eTable 2.** Complementary Post Hoc Intention-to-Treat Analyses

|                                                                                                                  | Glyburide<br>n = 448 | Insulin<br>n = 442 | Difference, % (95%<br>CI) | P Value <sup>a</sup> |
|------------------------------------------------------------------------------------------------------------------|----------------------|--------------------|---------------------------|----------------------|
| <b>Composite criterion components</b>                                                                            |                      |                    |                           |                      |
| Macrosomia, No. (%)                                                                                              | 75 (16.7)            | 65 (14.8)          | 2.0 (-3.1 to 7.1)         | 0.41                 |
| Hypoglycemia, No. (%)                                                                                            | 50 (10.9)            | 32 (7.2)           | 3.8 (-0.3 to 7.9)         | 0.045                |
| Hyperbilirubinemia, No. (%)                                                                                      | 17 (3.8)             | 14 (3.1)           | 0.6 (-1.8 to 3.1)         | 0.61                 |
| <b>Neonatal outcomes</b>                                                                                         |                      |                    |                           |                      |
| Birth weight, mean (SD), g                                                                                       | 3349 (497)           | 3331 (476)         | 18 (-47 to 81)            | 0.60                 |
| Birth weight > 4000g, No. (%)                                                                                    | 40 (9.3)             | 28 (6.6)           | 2.7 (-1.9 to 7.2)         | 0.14                 |
| APGAR ≤ 7 at 5 min, No. (%)                                                                                      | 5 (1.1)              | 11 (2.5)           | -1.4 (-3.1 to 0.04)       | 0.13                 |
| Reason for admission to NICU <sup>b</sup><br>before 48 h of life                                                 |                      |                    |                           |                      |
| Severe respiratory distress<br>syndrome, No                                                                      | 9                    | 11                 |                           |                      |
| Other reason <sup>c</sup> , No                                                                                   | 2                    | 0                  |                           |                      |
| <b>Maternal outcomes</b>                                                                                         |                      |                    |                           |                      |
| Insulin dose received, mean (SD),<br>units/day <sup>g</sup>                                                      | -                    | 19.6 (14.6)        |                           |                      |
| Glyburide dose received, mean (SD),<br>mg/day <sup>g</sup>                                                       | 5.6 (3.5)            | -                  |                           |                      |
| Maternal hypoglycemia: at least one<br>fasting or post prandial glycaemia <<br>0.4 g/L during pregnancy, No. (%) | 16 (3.8)             | 4 (1.0)            | 2.8 (0.4 to 5.4)          | 0.013                |

<sup>a</sup> P value of the test of the coefficient of the mixed effects model used to account for multiple centers: logistic for qualitative variables, linear for quantitative ones

<sup>b</sup> Neonatal Intensive Care Unit

<sup>c</sup> 1 malformation and 1 maternal/fetal infection

<sup>g</sup> Mean doses were calculated from diagnosis to delivery
